# Supplementary material
Source: ML conference proceedings conference paper supplement (https://openaccess.thecvf.com/content/CVPR_2019/html/Gallego_Focus_Is_All_CVPR_2019_paper.html)
Supplement: Supplementary file 2 [file Gallego_Focus_Is_All_CVPR_2019_supplemental.pdf]

# Focus Is All You Need: Loss Functions For Event-based Vision

## —Supplementary Material—

Guillermo Gallego <sup>†</sup>

Mathias Gehrig <sup>†</sup>

Davide Scaramuzza <sup>†</sup>

### A. Notation

#### A.1. $L^p$ norm of a vector-valued function

We define the  $L^p$  norm of a vector-valued function  $\mathbf{f} : \Omega \subset \mathbb{R}^d \rightarrow \mathbb{R}^n$  with components  $\{f_i\}_{i=1}^n$  (i.e.,  $\mathbf{f} = (f_1, \dots, f_n)^\top$ ) by

$$\|\mathbf{f}\|_{L^p(\Omega)} \doteq \left( \int_{\Omega} \|\mathbf{f}(\mathbf{x})\|^p d\mathbf{x} \right)^{1/p}, \quad (19)$$

where  $\|\mathbf{f}(\mathbf{x})\| = (\sum_{i=1}^n |f_i(\mathbf{x})|^p)^{1/p}$  is the  $p$ -norm in  $\mathbb{R}^n$ . With this convention,

$$\|\mathbf{f}\|_{L^p(\Omega)}^p = \sum_{i=1}^n \int_{\Omega} |f_i(\mathbf{x})|^p d\mathbf{x} = \sum_{i=1}^n \|f_i\|_{L^p(\Omega)}^p, \quad (20)$$

that is, the  $p$ -th power of the norm of  $\mathbf{f}$  is the sum of the  $p$ -th power of the norms of its components.

The two most common cases are  $p = 1$  and  $p = 2$ , which, for the gradient of an image,  $\nabla I = (I_x, I_y)^\top$ , yield simple expressions:

$$\|\nabla I\|_{L^1(\Omega)} = \int_{\Omega} (|I_x(\mathbf{x})| + |I_y(\mathbf{x})|) d\mathbf{x} \quad (21)$$

and

$$\|\nabla I\|_{L^2(\Omega)}^2 = \int_{\Omega} (I_x^2(\mathbf{x}) + I_y^2(\mathbf{x})) d\mathbf{x}. \quad (22)$$

#### A.2. Hessian Matrix

The Hessian matrix of a function, such as the IWE (used in (7)), is denoted by

$$\text{Hess}(I) = \begin{pmatrix} I_{xx} & I_{xy} \\ I_{xy} & I_{yy} \end{pmatrix}, \quad (23)$$

where the subscripts indicate derivatives.

The trace of the Hessian matrix is the Laplacian, which is used to define loss function (6).

### B. Area of the Image of Warped Events

To measure the “thickness” of the edges of the IWE (e.g., Fig. 3a), one could count the number of pixels with count of

warped events above a threshold, e.g., one event. However, this is brittle since it depends on this arbitrary threshold. We propose to define the above-mentioned edge thickness or “area” of an edge-like image like the IWE (3) in a more sensible way as a weighted sum of the interior of the level sets of the image, as we show next.

#### B.1. Definition of the Area of an Image

Using a Gaussian function (kernel) as a smooth approximation to the Dirac delta,  $\delta(\mathbf{x} - \boldsymbol{\mu}) \approx \mathcal{N}(\mathbf{x}; \boldsymbol{\mu}, \sigma^2 \text{Id})$ , the image of warped events (3) has, strictly speaking, an unbounded support (area of pixels with non-zero value). To have a meaningful support measure, we instead count the number of pixels with value greater than<sup>1</sup>  $\lambda$ ,

$$\text{supp}(I; \lambda) \doteq \int_{\Omega} H(I(\mathbf{x}) > \lambda) d\mathbf{x}, \quad (24)$$

where  $H(\cdot)$  is the Heaviside function. Fig. 9 shows several examples of it. This figure also illustrates the principle of area minimization, for a 1-D signal (3) with just two warped events. As observed, the area or thickness of  $I$  is minimized if the events are warped to the same location ( $\Delta \mathbf{x}' = \mathbf{0} \iff \mathbf{x}'_i = \mathbf{x}'_j$ ), which is the desired event alignment condition of corresponding events.

To have a support metric that does not depend on the particular value of the threshold  $\lambda$  used (for fixed kernel width  $\sigma$ ), we sum (24) over all threshold values,

$$\text{supp}(I) \doteq \int_0^\infty \rho(\lambda) \text{supp}(I; \lambda) d\lambda, \quad (25)$$

using a decreasing weighting function  $\rho$ , such as  $e^{-\lambda}$ , thus emphasizing the areas corresponding to  $\lambda \approx 0$  over those associated to  $\lambda \gg 0$ . In this way, an algorithm minimizing (25) will focus its attention on decreasing the area contribution of small thresholds, which are more important since the areas of larger thresholds are smaller due to the  $\lambda$ -support sets  $\{\mathbf{x} \in \mathbb{R}^2 \mid I(\mathbf{x}) > \lambda\}$  forming a family of nested subsets.

<sup>1</sup>We assume that  $I(\mathbf{x}) \geq 0$  either because event polarity is not used ( $b_k = 1$  in (3)) or because the support here defined is applied to images of positive and negative events separately, and the results are added.

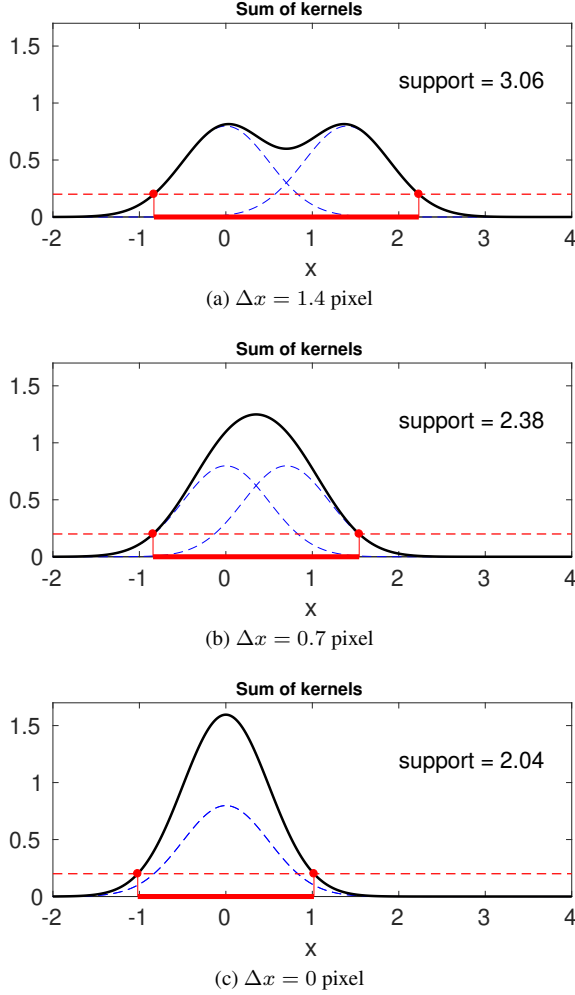

Figure 9: Illustration of the “area” or support of a 1-D image (3) with two events. The sum of the Gaussian kernels centered on each warped event (in blue) produces  $I(x)$  (in black), whose support (i.e., the set  $\{x \in \mathbb{R} \mid I(x) > \lambda = 0.2\}$ ) is displayed in solid red. The more aligned the events (smaller  $\Delta x = x'_2 - x'_1$ ), the smaller the support of  $I(x)$ .

Notice that it is not possible to use  $\rho = \text{const}$  since this leads to  $\text{supp}(I) = N_e$ , which does not depend on the motion parameters  $\theta$  we wish to optimize for. Using weighting functions with unit area (i.e.,  $\int_0^\infty \rho(\lambda) d\lambda = 1$ ) allows us to interpret (25) as a convex combination of supports (24), thus setting the correct scale so that (25) has the same units as (24).

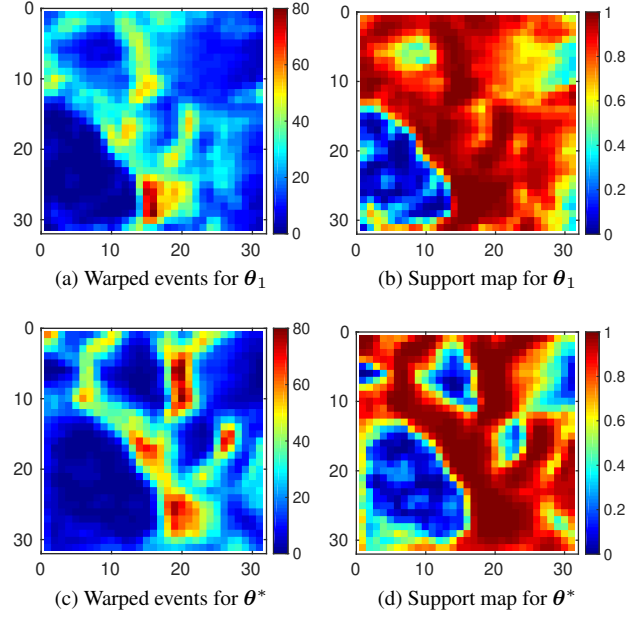

Figure 10: Illustration of the area (26) of a patch/image of warped events. Warped events  $I(\mathbf{x}; \theta)$  (left column) and corresponding per-pixel support maps  $F(I(\mathbf{x}; \theta)/10) - F(0)$  in (26) (right column), for two different motion parameters  $\theta$  (top:  $\theta_1 \equiv$  suboptimal; bottom:  $\theta_2 \equiv \theta^*$  optimal). Support scores (26):  $\text{supp}(I) = 0.72 |\Omega|$  (top) and  $\text{supp}(I) = 0.65 |\Omega|$  (bottom), with  $|\Omega| = 31^2 = 961$  pixels. The bottom patch has a smaller area (i.e., thinner edges) than the top patch, thus showing a better event alignment.

## B.2. Simplification of the Area of an Image

Substituting (24) in (25) and swapping the order of integration gives

$$\begin{aligned}
 \text{supp}(I) &= \int_{\Omega} \int_0^\infty \rho(\lambda) H(I(\mathbf{x}) > \lambda) d\lambda d\mathbf{x} \\
 &= \int_{\Omega} \int_0^{I(\mathbf{x})} \rho(\lambda) d\lambda d\mathbf{x} \\
 &= \int_{\Omega} [F(\lambda)]_0^{I(\mathbf{x})} d\mathbf{x} \\
 &= \int_{\Omega} (F(I(\mathbf{x})) - F(0)) d\mathbf{x}, \tag{26}
 \end{aligned}$$

where  $F(\lambda) \doteq \int \rho(\lambda) d\lambda$  is a primitive of  $\rho$ , and  $F(0)$  is constant. This is an advantageous expression compared to (25), since it states that  $\text{supp}(I)$  can be computed using the values of  $I(\mathbf{x})$  directly, without having to compute (24) for every threshold  $\lambda$  and then sum up the results. By using a continuous image formulation, we have analytically integrated the partial sums (24).

Fig. 10 illustrates (26). It shows the warped events

$I(\mathbf{x}; \boldsymbol{\theta})$  on a  $31 \times 31$  image patch for two different parameters  $\boldsymbol{\theta}_1, \boldsymbol{\theta}_2$  (depth values, in this example [35]). It also shows the corresponding integrands of (26), or “per-pixel support maps”  $F(I(\mathbf{x}; \boldsymbol{\theta})/\lambda_0) - F(0) \equiv 1 - \exp(-(I(\mathbf{x}; \boldsymbol{\theta})/\lambda_0))$ , with  $\lambda_0 = 10$  warped events. Pixels with  $I(\mathbf{x}) \gtrsim \lambda_0$  events contribute more to the support (26) than pixels with  $I(\mathbf{x}) \lesssim \lambda_0$  events, as shown in the support maps (right column of Fig. 10), which are color-coded from blue (low contribution) to red (high contribution).

Basically, the red regions of the support maps approximately indicate the area of the IWE, whereas the blue regions indicate the pixels where few warped events accumulate and therefore do not effectively contribute to the area of the IWE. Clearly, the bottom patch has a smaller area (i.e., thinner edges) than the top patch, as indicated by the smaller area of the red regions. The image area (26) is used to define the focus loss function (8).

### C. Loss Function: Image Entropy

As anticipated in (12), event alignment may be achieved by maximizing the entropy of the IWE, where

$$H(p(z)) \doteq - \int_{-\infty}^{\infty} p(z) \log p(z) dz \quad (27)$$

is Shannon’s (differential) entropy for a continuous random variable whose density function (PDF) is  $p(z)$ .

The PDF of an image is approximated by its histogram, normalized to have unitary area. In a continuous formulation, this is written as (see [56])

$$p_I(z) \doteq \frac{1}{|\Omega|} \int_{\Omega} \delta(z - I(\mathbf{x}; \boldsymbol{\theta})) d\mathbf{x}, \quad (28)$$

using the Dirac delta. This equation intuitively says that  $p_I(z)$  is computed as a ratio of areas: the “number of pixels” of the IWE with value  $z$ , divided by the total “number of pixels”,  $|\Omega| = \int_{\Omega} d\mathbf{x} = N_p$ .

Substituting (28) into (27), the entropy of the IWE becomes

$$\begin{aligned} H(p_I(z)) &= - \int_{-\infty}^{\infty} p_I(z) \log p_I(z) dz \\ &= - \int_{-\infty}^{\infty} \frac{1}{|\Omega|} \int_{\Omega} \delta(z - I(\mathbf{x})) d\mathbf{x} \log p_I(z) dz \\ &= - \frac{1}{|\Omega|} \int_{\Omega} \left( \int_{-\infty}^{\infty} \delta(z - I(\mathbf{x})) \log p_I(z) dz \right) d\mathbf{x} \\ &= - \frac{1}{|\Omega|} \int_{\Omega} \log p_I(I(\mathbf{x})) d\mathbf{x}. \end{aligned} \quad (29)$$

Observe that the entropy is maximized by favoring large values of  $\log(1/p_I(I(\mathbf{x})))$  over smaller ones. Since log is concave, it means that large values of  $1/p_I(I(\mathbf{x}))$  are favored, i.e., small values of  $p_I(I(\mathbf{x}))$  are favored. For a PDF

that is concentrated around  $I = 0$  (large  $p_I(0)$ ), as shown on the last column of Fig. 2), favoring small density values implies that they must be achieved away from  $I = 0$ , i.e., for large  $|I|$  values (which are caused by the aggregation of aligned events). Thus, maximizing the entropy increases the range of  $I(\mathbf{x})$ , producing a higher contrast image.

### D. Loss Function: Image Range

We measure the image range by means of the support of its PDF (28),

$$\text{supp}(p_I) \doteq \int_0^{\infty} \rho(\lambda) \text{supp}(p_I(z); \lambda) d\lambda, \quad (30)$$

where the weight function  $\rho(\lambda) \geq 0$  emphasizes the contributions of small  $|\lambda|$  over those of large  $|\lambda|$ , according to the typical shape of the PDF of the event image (concentrated around  $\lambda = 0$ ).

Mimicking the steps in Section B, Eq. (30) can be rewritten as

$$\begin{aligned} \text{supp}(p_I) &= \int_{-\infty}^{\infty} \int_0^{\infty} \rho(\lambda) H(p_I(z) > \lambda) d\lambda dz \\ &= \int_{-\infty}^{\infty} \int_0^{p_I(z)} \rho(\lambda) d\lambda dz \\ &= \int_{-\infty}^{\infty} [F(\lambda)]_0^{p_I(z)} dz \\ &= \int_{-\infty}^{\infty} (F(p_I(z)) - F(0)) dz, \end{aligned} \quad (31)$$

where  $F(\lambda)$  is a primitive of  $\rho(\lambda)$ , and  $F(0)$  is constant.

The motion parameters are found by maximizing (31), i.e., (13). The same weighting functions and primitives as for the image area (Section 3.3) may be used (with even symmetry if event polarity is used in the IWE (3)). This approach is inspired by the maximization of the entropy of the PDF of the image of warped events, as explained in Section C.

### E. Loss Function: Spatial Autocorrelation

#### E.1. Moran’s $I$ Index

Moran’s  $I$  index (17) (or “serial correlation coefficient” [47]) is a measure of spatial autocorrelation, i.e., it measures how similar is one object with respect to its neighbors. It is a concept that applies to variables whose values are known in unstructured grids (spatial units), in general (see Fig. 11).

If the variable of interest  $z$  consists of the intensity values of an image,  $z_i = I(\mathbf{x}_i)$ , which is defined on a regular (pixel) lattice  $\{\mathbf{x}_i\}$ , and the weights  $w_{ij}$  are shift-invariant (they do not depend on the particular location of pixels  $i$  and  $j$ , only on their relative spatial arrangement) and symmetric

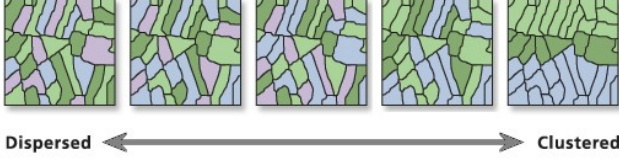

Figure 11: Illustration of spatial autocorrelation by Moran's index. A negative index indicates dispersion, whereas a positive index indicates clustering. The IWE differs from the figure above in the sense that its pixel values vary continuously with respect to the warping parameters, i.e., they are not fixed values that move around as in the figure. Image courtesy of ArcGIS.com <https://pro.arcgis.com/en/pro-app/tool-reference/spatial-statistics/spatial-autocorrelation.htm>

$w_{ij} = w_{ji}$ , then it is possible to write Moran's  $I$  index using a convolution. In the formalism of continuous images  $z(\mathbf{x})$  over a domain  $\Omega$ , Moran's  $I$  index becomes

$$\text{Moran}(z) \doteq \frac{1}{|\Omega|} \int_{\Omega} z^s(\mathbf{x}) (z^s(\mathbf{x}) * \tilde{w}(\mathbf{x})) d\mathbf{x}, \quad (32)$$

where the standardized image  $z^s(\mathbf{x}) \doteq (z(\mathbf{x}) - \bar{z})/\sigma_z$  is obtained by normalizing  $z$  with its mean  $\bar{z}$  and variance  $\sigma_z^2$  over  $\Omega$ . The weights  $\tilde{w}(\mathbf{x})$  should produce, in the convolution  $z^s(\mathbf{x}) * \tilde{w}(\mathbf{x})$ , a sum of the neighboring values of  $z^s(\mathbf{x})$  (excluding the central value at  $\mathbf{x}$ ). Thus, it is natural to consider the weights from a Gaussian kernel  $G_{\sigma}(\mathbf{x})$  with a zero at the origin:

$$\tilde{w}(\mathbf{x}) = \frac{G_{\sigma}(\mathbf{x}) - G_{\sigma}(\mathbf{0})\delta(\mathbf{x})}{1 - G_{\sigma}(\mathbf{0})}. \quad (33)$$

The integrand of (32) is the local Moran's  $I$  index, and it is the element-wise product of the standardized variable  $z^s$  with a low-pass filtered version of itself. It is positive if both  $z^s$  and neighboring values  $z^s(\mathbf{x}) * \tilde{w}(\mathbf{x})$  are higher or lower than the mean; and it is negative if the value and neighboring values are on opposite sides of the mean (one higher, the other lower). Increasing event alignment corresponds to favoring negative local Moran indices (dissimilar IWE pixels next to each other), and therefore, a negative (global) Moran's  $I$  index.

## E.2. Geary's Contiguity Ratio

Geary's contiguity ratio is a generalization of Von Neumann's ratio [50] of the mean square successive difference (numerator of (18)) to the variance (denominator of (18)). Geary's contiguity ratio is non-negative, and its mean is 1 for random images. Values of  $C$  significantly lower than 1 demonstrate positive spatial autocorrelation (the variable of interest is regarded as *contiguous*), while values significantly higher than 1 illustrate negative autocorrelation.

In the formalism of continuous images, Geary's contiguity ratio can be written as

$$C(z) = \frac{1}{2} \frac{1}{|\Omega|} \int_{\Omega} c(\mathbf{x}) d\mathbf{x}, \quad (34)$$

with local score efficiently computed using convolutions:

$$c(\mathbf{x}) \doteq (z^s(\mathbf{x}))^2 + (z^s(\mathbf{x}))^2 * \tilde{w}(\mathbf{x}) - 2z^s(\mathbf{x}) (z^s * \tilde{w})(\mathbf{x}). \quad (35)$$

Notice that the last term in (35) also appears in Moran's  $I$  index (32). Thus, Geary's  $C$  is inversely related to Moran's  $I$ , but they are not identical.

Homogeneous regions of an image  $z(\mathbf{x})$  have a positive spatial autocorrelation, indicated by  $c(\mathbf{x}) < 1$ . The regions with large values of (35), i.e., negative spatial autocorrelation, are those corresponding to the edges of the objects (dissimilar intensity values on each side of the edge). Thus, Geary's local statistic (35) acts as an edge detector (see Figs. 13 or 15).

## F. Loss Function: Aggregation of Local Statistics

Similarly to (14), aggregating other local statistics of the IWE also yield focus measures. For example, the aggregation of the local mean absolute deviation (ALMAD),

$$\text{ALMAD}(I) \doteq \int_{\Omega} \text{MAD}(\mathbf{x}; I) d\mathbf{x}, \quad (36)$$

with

$$\text{MAD}(\mathbf{x}; I) \doteq \frac{1}{|B(\mathbf{x})|} \int_{B(\mathbf{x})} |I(\mathbf{u}; \theta) - \mu(\mathbf{x}; I)| d\mathbf{u}, \quad (37)$$

is closely related to (14) since both aggregate local measures that are edge-detectors of  $I$  ((15) uses the  $L^2$  norm, whereas (37) uses the  $L^1$  norm). Using a weighted neighborhood (e.g., Gaussian kernel  $G_{\sigma}$ ), (37) can be efficiently approximated by the formula with two convolutions:

$$\text{MAD}(\mathbf{x}; I) \approx |I(\mathbf{x}) - (I(\mathbf{x}) * G_{\sigma}(\mathbf{x}))| * G_{\sigma}(\mathbf{x}), \quad (38)$$

where the inner convolution approximates the local mean,  $\mu(\mathbf{x}; I) \approx I(\mathbf{x}) * G_{\sigma}(\mathbf{x})$ , and the outer convolution averages the magnitude of the local, centered IWE (integrand of (37)) over the neighborhood around  $\mathbf{x}$ .

Omitting the local mean in (15) and (37) leads to local versions of the MS and the MAV, respectively. These operators, however, are not edge detectors; nevertheless, they also work as focus loss functions since the images on which they are applied, the IWEs, are edge-like images (the events are brightness changes, i.e., they are related to the temporal derivative of the brightness signal). Similarly to the (global) MAV, the local MAV does not provide enough information to estimate the warp parameters  $\theta$  if polarity is not used (as indicated in Table 2).

## G. Plots of the Local Loss Maps

Most of the loss functions considered can be written as integrals over the IWE domain. Figs. 12, 13, 14 and 15 visualize the integrands (i.e., “local loss”) of most focus loss functions, for two scenes: `dynamic` and `boxes` from the dataset [45]. Images are given in pairs (with a common caption below the images): local loss before optimization (without motion compensation, on the left), and after optimization of the corresponding focus loss function (motion-compensated, on the right). Each image pair shares the same color scale for proper visualization of how the local loss changes before and after optimization. For reference, since the local loss are transformations of the IWE, Figs. 12 and 14 also provide, on the top right, the IWE before and after optimization with one of the loss functions (the variance).

The local loss of area-based loss functions is the support map, as in Figs. 3b and 10. The focus loss given by the IWE range (13) is not expressed as an integral over the image domain, therefore, no image integrand is visualized in the above-mentioned figures. MAV and local MAV are not displayed either since they cannot be optimized with respect to the parameters.

Notice that all local loss maps are represented using the same color scheme, from blue (small) to large (yellow). For objective functions formulated as maximization problems (variance, gradient magnitude, etc.), visually good maps are those that are almost “blue” for IWEs with bad event-alignment parameters, and that clearly show “yellow” regions where events align (due to good parameters  $\theta$ ). For objective functions formulated as minimization problems (e.g., area-based, loss based on the mean timestamp per pixel), the situation is the opposite: good local loss maps become less yellowish and more blueish as event alignment improves due to good parameters  $\theta$ .

## H. Additional Experiments on Accuracy Evaluation

Tables 3 and 4 provide further quantitative evaluations of the considered focus loss functions. Results correspond to the `boxes` and `poster` sequences in [45], undergoing a rotational motion with velocities close to  $1000^\circ/\text{s}$ . Looking at the RMS errors, these are small compared to the excursion of the signal. The RMS columns of these tables are summarized in Table 2.

## I. Additional Plots of Focus Loss Functions in Optical Flow Space

Figs. 16 and 17 present experiments with events in a small space-time window ( $31 \times 31$  pixels and  $\Delta t = 200$  ms), yielding approximately 2000 events, from a se-

quence of the dataset [45]. The goal of these figures is to visualize the “shape” or “signature” of the focus loss functions (as heat maps, pseudo-colored from blue to red).

The top-left image shows the patch on the intensity frame (not used) corresponding to the space-time window of events, highlighted in yellow, and three candidate flow vectors  $\{\theta_i\}_{i=0}^2$  (marked with red, blue and green arrows, respectively). The ground truth flow is close to  $\theta_2 = (-40, 0)\text{pixel/s}$ . The top row also shows the warped events (IWE patch) using the three flow vectors, without polarity in the IWE (Fig. 16) or with polarity (Fig. 17). The remaining rows show the focus loss functions in optical flow space, with  $\pm 60\text{ pixel/second}$  around  $\theta_2$ . Some focus functions are designed to be maximized (and therefore should present a local maximum at  $\theta_2$ ), while others are designed to be minimized (and should present a local minimum at  $\theta_2$ ).

**Without Polarity.** Rows 2 and 3 of the figures show the variance, MS, MAD, MAV and their aggregation of local versions. They are all visualized in the range  $[0, 1]$ , by dividing by the maximum value of the focus function. Without using polarity (Fig. 16), the variance presents a nice peak at the correct optical flow  $\theta_2$ , the peaks of the MS and MAD functions are not as pronounced, and the MAV function does not have the maximum at the ground truth location (we explained that, without polarity, the MAV cannot be used to estimate  $\theta$ ). The local versions (third row of Fig. 16) are slightly narrower than the global versions. The fourth row presents the four area-based focus losses (Section B), whose goal is to be minimized, and indeed, they present a local minimum at  $\theta_2$ . There are not big differences in these four area-based losses. The fifth row shows more statistics-based losses. The range and Geary’s C show a local maximum at the correct flow. Moran’s index shows a local minimum, as expected, at the correct flow. The entropy, without using polarity, does not have a local maximum at the correct flow. Instead, using polarity (Fig. 17), it does have a local maximum at  $\theta_2$ . The last two rows of Figs. 16 and 17 show focus loss functions based on the IWE derivatives and their variances (composite losses). They all present a clear peak at the correct depth (as the case of the variance and local variance); some of them are more narrow than others (all are visualized in the range  $[0, 1]$ , for ease of comparison). The gradient magnitude (based on Sobel operator), the DoG magnitude and the LoG magnitude seem to be the smoothest of these two rows.

**With Polarity.** Fig. 17 shows the results on the same experiment as Fig. 16, but using event polarity in the IWE. In a scene with approximately equal number of dark-to-bright and bright-to-dark transitions, the number of positive and negative events is approximately balanced, and so, the mean of the IWE is approximately zero. Thus, in this



| Focus Loss Function             | Without polarity |              |              |              |              |              | With polarity |              |              |             |              |              |
|---------------------------------|------------------|--------------|--------------|--------------|--------------|--------------|---------------|--------------|--------------|-------------|--------------|--------------|
|                                 | $\omega_x$       | $\omega_y$   | $\omega_z$   | $\mu$        | $\sigma$     | RMS          | $\omega_x$    | $\omega_y$   | $\omega_z$   | $\mu$       | $\sigma$     | RMS          |
| Variance (4) [33,35]            | 15.69            | 19.53        | 20.34        | -0.31        | 18.42        | 18.52        | 16.03         | 19.67        | 21.12        | -0.64       | 18.78        | 18.94        |
| Mean Square (9) [33,36]         | 16.05            | 20.03        | 23.70        | -0.49        | 19.83        | 19.93        | 16.04         | 19.67        | 21.36        | -0.57       | 18.86        | 19.02        |
| Mean Absolute Deviation (10)    | 15.40            | <b>18.99</b> | 23.99        | -0.49        | 19.40        | 19.46        | 15.93         | 19.15        | 23.67        | -0.57       | 19.40        | 19.58        |
| Mean Absolute Value (11)        | -                | -            | -            | -            | -            | -            | 15.95         | 19.16        | 24.22        | -0.61       | 19.60        | 19.77        |
| Entropy (12)                    | 19.29            | 21.73        | 44.48        | 0.03         | 28.14        | 28.50        | 18.03         | 20.50        | 41.10        | -0.20       | 26.19        | 26.54        |
| Area (8) (Exp)                  | 19.70            | 21.57        | 53.23        | 0.10         | 31.41        | 31.50        | 15.89         | 19.12        | 23.60        | -0.27       | 19.39        | 19.54        |
| Area (8) (Gaussian)             | 18.12            | 20.20        | 39.22        | 0.10         | 25.78        | 25.85        | 15.67         | <b>18.77</b> | 22.11        | -0.33       | 18.69        | 18.85        |
| Area (8) (Lorentzian)           | 20.56            | 21.69        | 55.04        | 0.42         | 32.30        | 32.43        | 15.48         | 19.36        | 28.11        | -0.02       | 20.85        | 20.98        |
| Area (8) (Hyperbolic)           | 18.71            | 20.67        | 47.99        | 0.07         | 29.05        | 29.13        | 15.69         | 18.90        | 22.86        | -0.27       | 18.99        | 19.15        |
| Range (13) (Exp)                | 18.68            | 22.72        | 44.59        | 0.39         | 28.16        | 28.66        | 17.29         | 19.38        | 49.50        | -0.48       | 28.23        | 28.72        |
| Local Variance (14)             | 16.17            | 19.55        | 18.90        | -0.41        | 17.94        | 18.21        | 16.04         | 19.55        | 19.61        | -0.21       | 18.15        | 18.40        |
| Local Mean Square               | 18.37            | 21.42        | 34.65        | 0.59         | 24.31        | 24.81        | 16.68         | 20.21        | 22.67        | -0.05       | 19.53        | 19.86        |
| Local Mean Absolute Deviation   | 16.36            | 19.39        | 28.35        | -0.35        | 21.10        | 21.37        | 15.78         | 19.06        | 21.37        | -0.20       | 18.47        | 18.74        |
| Local Mean Absolute Value       | -                | -            | -            | -            | -            | -            | 18.13         | 20.17        | 34.00        | -0.42       | 23.61        | 24.10        |
| Moran's Index (17)              | 17.87            | 20.74        | 34.24        | -0.99        | 23.87        | 24.28        | 16.97         | 20.01        | 33.31        | -0.08       | 23.18        | 23.43        |
| Geary's Contiguity Ratio (18)   | 17.48            | 20.21        | 33.93        | -0.58        | 23.50        | 23.87        | 16.00         | 19.42        | 23.07        | 0.04        | 19.25        | 19.50        |
| Gradient Magnitude (5)          | 16.12            | 19.53        | <b>17.84</b> | -0.71        | <b>17.58</b> | <b>17.83</b> | 15.90         | 19.46        | 18.93        | -0.79       | 17.91        | 18.10        |
| Laplacian Magnitude (6)         | 15.63            | 20.92        | 18.42        | -0.01        | 18.09        | 18.32        | 14.52         | 19.93        | <b>18.28</b> | <b>0.03</b> | <b>17.36</b> | <b>17.58</b> |
| Hessian Magnitude (7)           | 16.26            | 19.69        | 19.29        | -0.22        | 18.14        | 18.41        | 15.89         | 19.43        | 18.46        | -0.30       | 17.70        | 17.93        |
| Difference of Gaussians (DoG)   | 14.79            | 20.22        | 27.54        | 0.66         | 20.50        | 20.85        | 14.99         | 20.52        | 22.25        | 0.43        | 18.92        | 19.25        |
| Laplacian of the Gaussian (LoG) | <b>14.64</b>     | 20.45        | 26.00        | 0.50         | 20.09        | 20.36        | <b>14.42</b>  | 20.09        | 18.80        | 0.47        | 17.49        | 17.77        |
| Variance of Laplacian           | 16.30            | 19.70        | 18.78        | -0.45        | 18.02        | 18.26        | 15.95         | 19.45        | 18.71        | -0.32       | 17.81        | 18.01        |
| Variance of Gradient            | 16.26            | 19.71        | 20.11        | <b>-0.00</b> | 18.49        | 18.69        | 16.10         | 19.75        | 21.39        | 0.31        | 18.84        | 19.08        |
| Variance of Squared Gradient    | 16.50            | 20.02        | 19.64        | -0.10        | 18.46        | 18.72        | 16.22         | 20.08        | 20.56        | 0.06        | 18.72        | 18.95        |
| Mean Timestamp on Pixel [37]    | 42.48            | 39.40        | 166.81       | 0.54         | 82.87        | 82.89        | -             | -            | -            | -           | -            | -            |

Table 3: *Accuracy and Timing Comparison of Focus Loss Functions.* Angular velocity errors (in deg/s) of the motion compensation method [35] (with or without polarity) with respect to motion-capture system. The six columns per case are the errors in each component of the angular velocity and their mean, standard deviation and RMS values. Processing  $N_e = 30\,000$  events, warped onto an image of  $240 \times 180$  pixels (DAVIS camera [52]). Sequence: `boxes_rotation` from the Event Camera Dataset [45]. Best value per column is in bold.

case, the MS is approximately equal to the variance, and the MAV approximates the MAD. This is noticeable in the second row of Fig. 17. A similar trend is observed in the local versions of the four above statistics, albeit the local variance and MAD present narrower peaks than the local MS and MAV, respectively. The area-based focus functions are computed by splitting the events according to polarity, computing the areas of the two resulting IWEs and adding their area values. The corresponding plots, in the fourth row of Fig. 17 are similar to those without polarity (Fig. 16, except for the vertical scale). The entropy and range improve if event polarity is used, basically because the PDF becomes double-sided and it allows us to distinguish positive and negative IWE edges/values. Moran's index and Geary's  $C$  ratio are not good focus losses if polarity is used, since they present brittle local minimum/maximum, respectively. The derivative-based losses present a clear peak at the correct flow, and slightly more pronounced than their counterparts in Fig. 16.

## J. Additional Plots on Depth Estimation

Fig. 18 shows in more detail Fig. 6: depth estimation for a patch from a sequence of the dataset [45]. The sequence was recorded with a DAVIS camera [52], camera poses were recorded by a motion-capture system, and the camera was calibrated, so the only unknown is the scene structure (i.e., depth). Fig. 18b shows how the values of the focus functions vary with respect to the depth parameter  $\theta \equiv Z$ , for the events corresponding to the patch highlighted in Fig. 18a. Remarkably, the focus curves have a smooth variation, with a clear extrema around the correct depth value. Fig. 18a shows the warped events (IWE) for a depth  $Z = 1.11$  m, close to the peaks of the focus curves. The IWE is pseudo-colored, from few event count (blue) to large event count (red). It shows that the events produce a sharp image at the patch location, whereas other parts of the image are "out of focus" since events do not align at that depth [15,35]. Clearly, some focus curves are narrower than others (Fig. 18b), showing better properties for determining the optimal depth location. We observe that the entropy and

| Focus Loss Function             | Without polarity |              |              |             |              |              | With polarity |              |              |              |              |              |
|---------------------------------|------------------|--------------|--------------|-------------|--------------|--------------|---------------|--------------|--------------|--------------|--------------|--------------|
|                                 | $\omega_x$       | $\omega_y$   | $\omega_z$   | $\mu$       | $\sigma$     | RMS          | $\omega_x$    | $\omega_y$   | $\omega_z$   | $\mu$        | $\sigma$     | RMS          |
| Variance (4) [33, 35]           | 26.67            | 20.24        | 30.95        | <b>0.45</b> | 25.93        | 25.96        | 26.50         | 19.86        | 26.80        | <b>-0.20</b> | 24.36        | 24.39        |
| Mean Square (9) [33, 36]        | 28.44            | 25.89        | 47.97        | 3.70        | 33.43        | 34.10        | 26.90         | 21.23        | 30.79        | 1.19         | 26.14        | 26.31        |
| Mean Absolute Deviation (10)    | 27.25            | 22.16        | 42.66        | 1.25        | 30.43        | 30.70        | 27.11         | 21.73        | 40.03        | 1.71         | 29.40        | 29.62        |
| Mean Absolute Value (11)        | -                | -            | -            | -           | -            | -            | 27.18         | 22.19        | 40.33        | 2.18         | 29.65        | 29.90        |
| Entropy (12)                    | 32.81            | 41.12        | 68.70        | 3.63        | 46.98        | 47.54        | 27.65         | 22.73        | 49.27        | 2.36         | 32.98        | 33.21        |
| Area (8) (Exp)                  | 33.12            | 22.50        | 73.75        | -0.73       | 42.94        | 43.12        | 26.31         | 19.53        | 33.36        | -0.42        | 26.36        | 26.40        |
| Area (8) (Gaussian)             | 28.40            | 21.07        | 54.02        | -0.59       | 34.36        | 34.50        | 26.15         | 19.20        | 30.70        | -0.41        | 25.31        | 25.35        |
| Area (8) (Lorentzian)           | 28.51            | 21.69        | 57.41        | -0.92       | 35.71        | 35.86        | 26.30         | 19.63        | 33.77        | -0.59        | 26.52        | 26.57        |
| Area (8) (Hyperbolic)           | 27.39            | 20.65        | 50.78        | -0.84       | 32.82        | 32.94        | 26.27         | 19.35        | 32.01        | -0.41        | 25.84        | 25.88        |
| Range (13) (Exp)                | 32.18            | 37.73        | 61.70        | 3.44        | 43.32        | 43.87        | 24.48         | 19.53        | 45.99        | 1.56         | 29.86        | 30.00        |
| Local Variance (14)             | 26.95            | 20.49        | 28.87        | 1.11        | 25.34        | 25.44        | 26.48         | 20.32        | 25.66        | 0.88         | 24.06        | 24.15        |
| Local Mean Square               | 28.47            | 25.58        | 47.79        | 3.79        | 33.28        | 33.95        | 26.74         | 21.25        | 31.41        | 1.26         | 26.30        | 26.47        |
| Local Mean Absolute Deviation   | 47.61            | 53.19        | 84.85        | 4.55        | 61.67        | 61.89        | 26.42         | 20.03        | 29.41        | 0.95         | 25.22        | 25.29        |
| Local Mean Absolute Value       | -                | -            | -            | -           | -            | -            | 27.19         | 22.34        | 41.57        | 2.22         | 30.10        | 30.37        |
| Moran's Index (17)              | 28.32            | 21.57        | 47.31        | 1.39        | 32.32        | 32.40        | 27.70         | 20.99        | 44.18        | 1.32         | 30.90        | 30.96        |
| Geary's Contiguity Ratio (18)   | 27.63            | 20.78        | 31.44        | 0.89        | 26.56        | 26.61        | 26.52         | 20.25        | 28.90        | 1.19         | 25.15        | 25.23        |
| Gradient Magnitude (5)          | 26.61            | 20.50        | <b>24.69</b> | 0.61        | <b>23.85</b> | <b>23.93</b> | 26.34         | 20.01        | 24.40        | <b>-0.20</b> | 23.54        | 23.58        |
| Laplacian Magnitude (6)         | 27.24            | 20.74        | 26.76        | 0.64        | 24.85        | 24.91        | 26.29         | 20.25        | 24.46        | 0.61         | 23.60        | 23.67        |
| Hessian Magnitude (7)           | 27.20            | 22.40        | 26.81        | 0.95        | 25.39        | 25.47        | 26.36         | 20.24        | 24.61        | 0.80         | 23.66        | 23.74        |
| Difference of Gaussians (DoG)   | <b>24.51</b>     | 18.01        | 30.97        | 1.45        | 24.41        | 24.50        | 24.29         | 17.85        | 24.30        | 0.75         | <b>22.10</b> | <b>22.15</b> |
| Laplacian of the Gaussian (LoG) | 24.66            | <b>17.96</b> | 32.85        | 1.27        | 25.10        | 25.15        | <b>24.20</b>  | <b>17.78</b> | 30.04        | 1.30         | 23.94        | 24.01        |
| Variance of Laplacian           | 26.85            | 27.84        | 25.10        | 0.77        | 26.52        | 26.59        | 26.26         | 20.23        | <b>24.38</b> | 0.53         | 23.56        | 23.62        |
| Variance of Gradient            | 26.85            | 27.84        | 25.10        | 0.77        | 26.52        | 26.60        | 26.63         | 20.29        | 25.44        | 0.96         | 24.12        | 24.22        |
| Variance of Squared Gradient    | 26.80            | 21.14        | 30.36        | 1.29        | 25.97        | 26.10        | 26.72         | 20.94        | 25.63        | 1.13         | 24.32        | 24.43        |
| Mean Timestamp on Pixel [37]    | 64.94            | 87.19        | 211.4        | 0.94        | 121.1        | 121.2        | -             | -            | -            | -            | -            | -            |

Table 4: *Accuracy Comparison of Focus Loss Functions* on the `poster.rotation` sequence from dataset [45]. Angular velocity errors (in deg/s) of the motion compensation method [35] (with or without polarity) with respect to motion-capture system. The six columns per case are the errors in each component of the angular velocity and their mean, standard deviation and RMS values. Processing  $N_e = 30\,000$  events, warped onto an image of  $240 \times 180$  pixels (DAVIS camera [52]). On each column, the best value is highlighted in bold.

the range curves have wide peaks, and therefore do not determine depth very precisely.

**Semi-dense 3D Reconstruction.** Fig. 19 shows depth estimation for every pixel of a reference view along the trajectory of the event camera. For every pixel, we compute focus curves, as those in Fig. 18b, and select the depth at the peak. To capture fine spatial details, the focus functions are computed on patches of  $3 \times 3$  pixels in the reference view, weighted by a Gaussian kernel to emphasize the contribution of the center pixel. We also record the value of the focus function at the peak for every pixel of the reference view. These values are displayed as a “focus confidence map” in Fig. 19. For better visualization, the focus values are represented in negative form, from bright (low focus value) to dark (high focus value). The confidence map is used to select the pixels in the reference view with largest focus, i.e., the pixels for which depth is most reliably estimated. The above selection yields a semi-dense depth map, which is displayed color coded, overlaid on the intensity frame from the DAVIS camera [52] at the reference view.

We used adaptive thresholding [46, p.780] on the focus confidence map, and a median filter to remove spike noise from the depth map. As it is seen, depth is most reliably estimated at strong brightness edges of the scene. Finally, the depth map is also visualized as a point cloud, color-coded according to depth (Fig. 19).

The figure compares some representative focus functions. In general, we obtain good depth 3D reconstructions with the methods tested. Some methods produce slightly noisier 3D reconstructions than others, and some recover more edges than others. This is due to both the shape of the focus confidence maps and the adaptive thresholding parameters. We observe that focus functions as simple as the local mean square (MS) or the local mean absolute deviation (MAD) produce good results. These semi-dense 3D reconstruction methods may be used as the mapping module of an event-based visual odometry system, such as [23], to enable camera pose estimation from the 3D reconstructed scene.

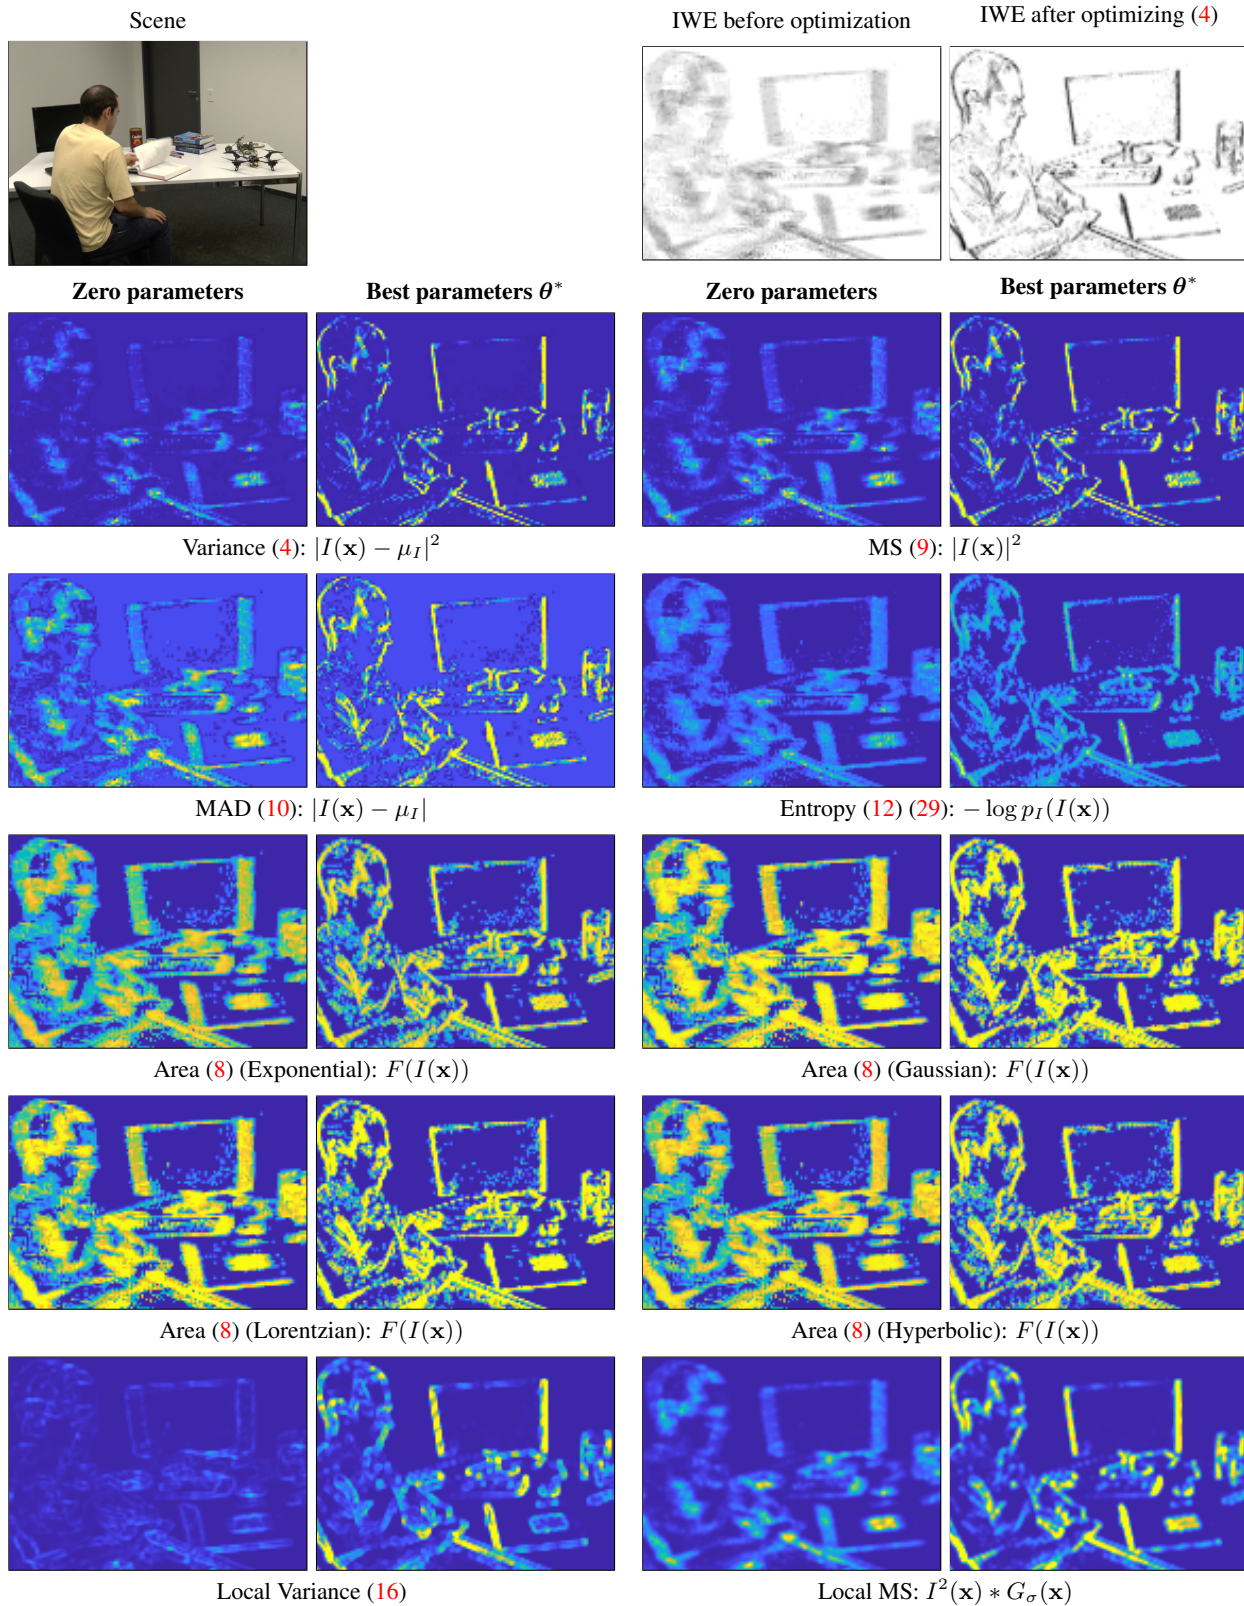

Figure 12: Visualization of the local loss (i.e., integrands of the Focus Loss Functions), pseudo-colored from blue (small) to yellow (large). Same scene as in the top row of Fig. 2 (i.e., without using polarity). Images are given in pairs: local loss before optimization (no motion compensation, Left), and after optimization of the corresponding focus loss function (motion-compensated, Right). The local loss of area-based loss functions is the “support map”, as in Figs. 3b and 10.



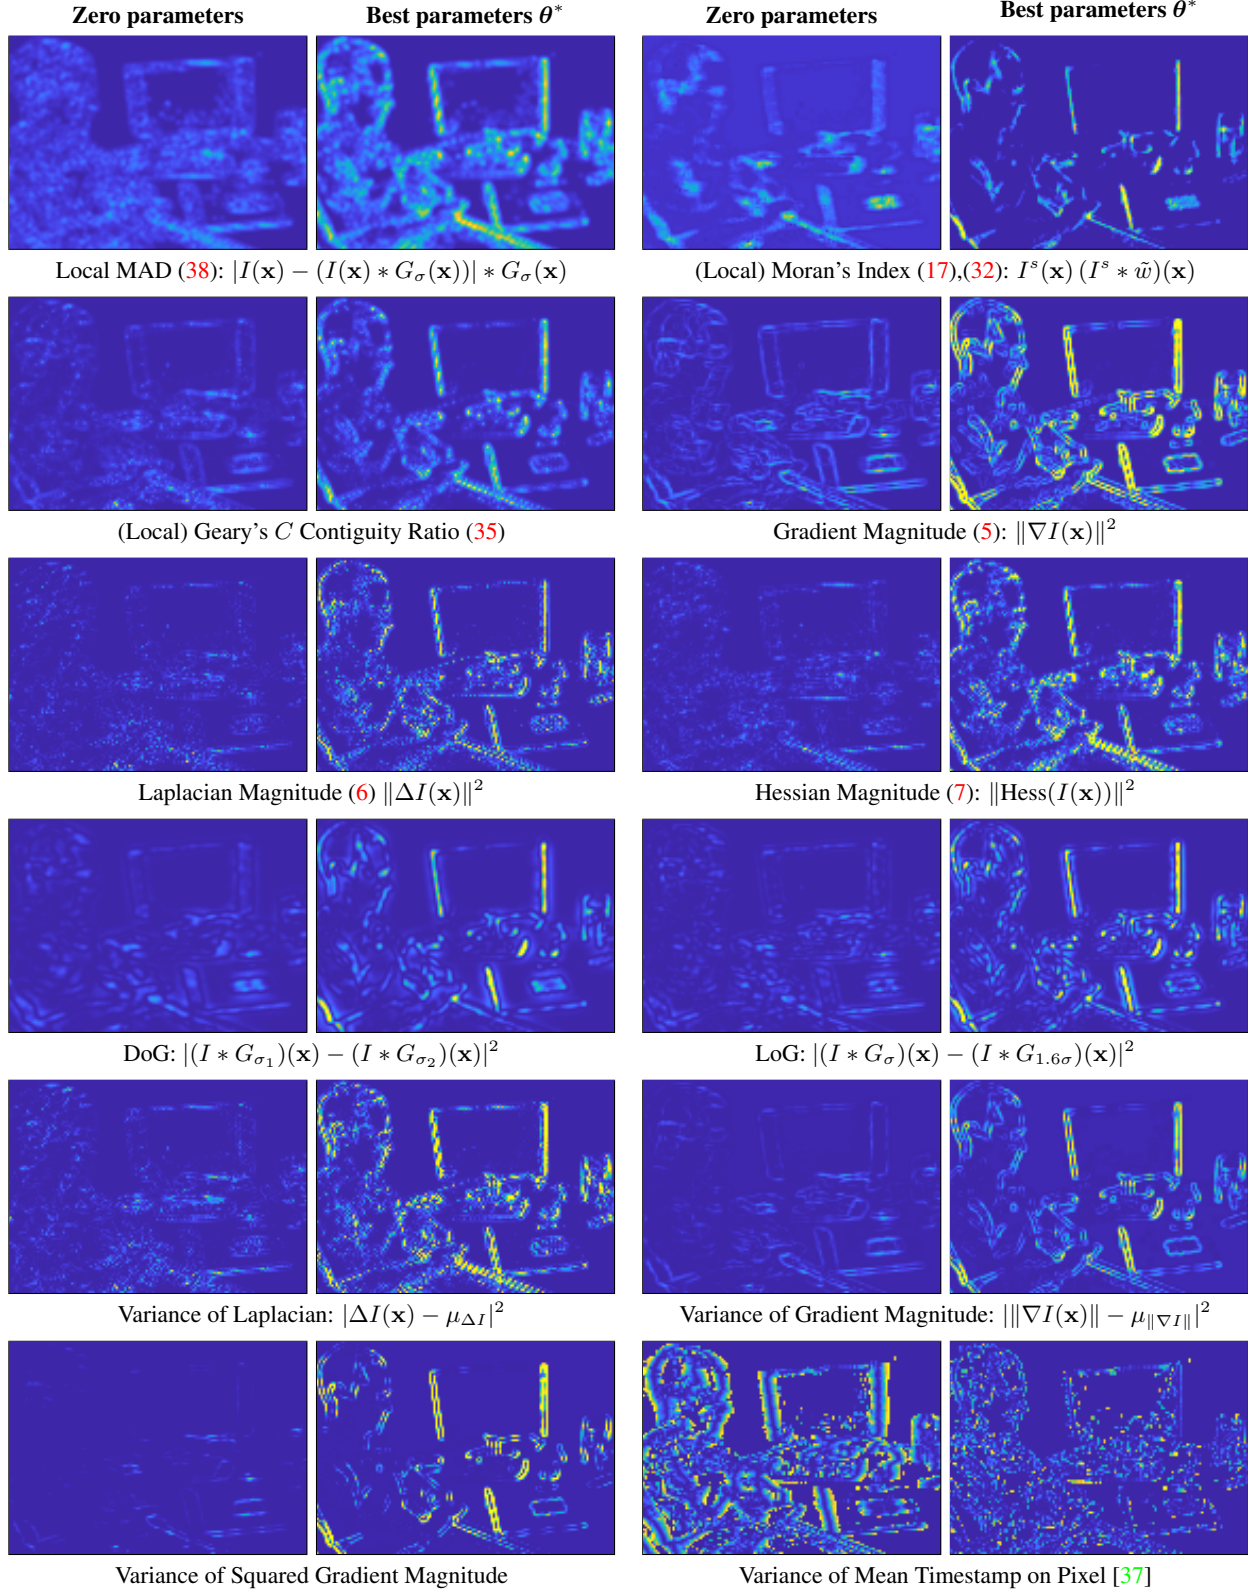

Figure 13: Visualization of local scores (i.e., integrands) of the Focus Loss Functions (continuation).



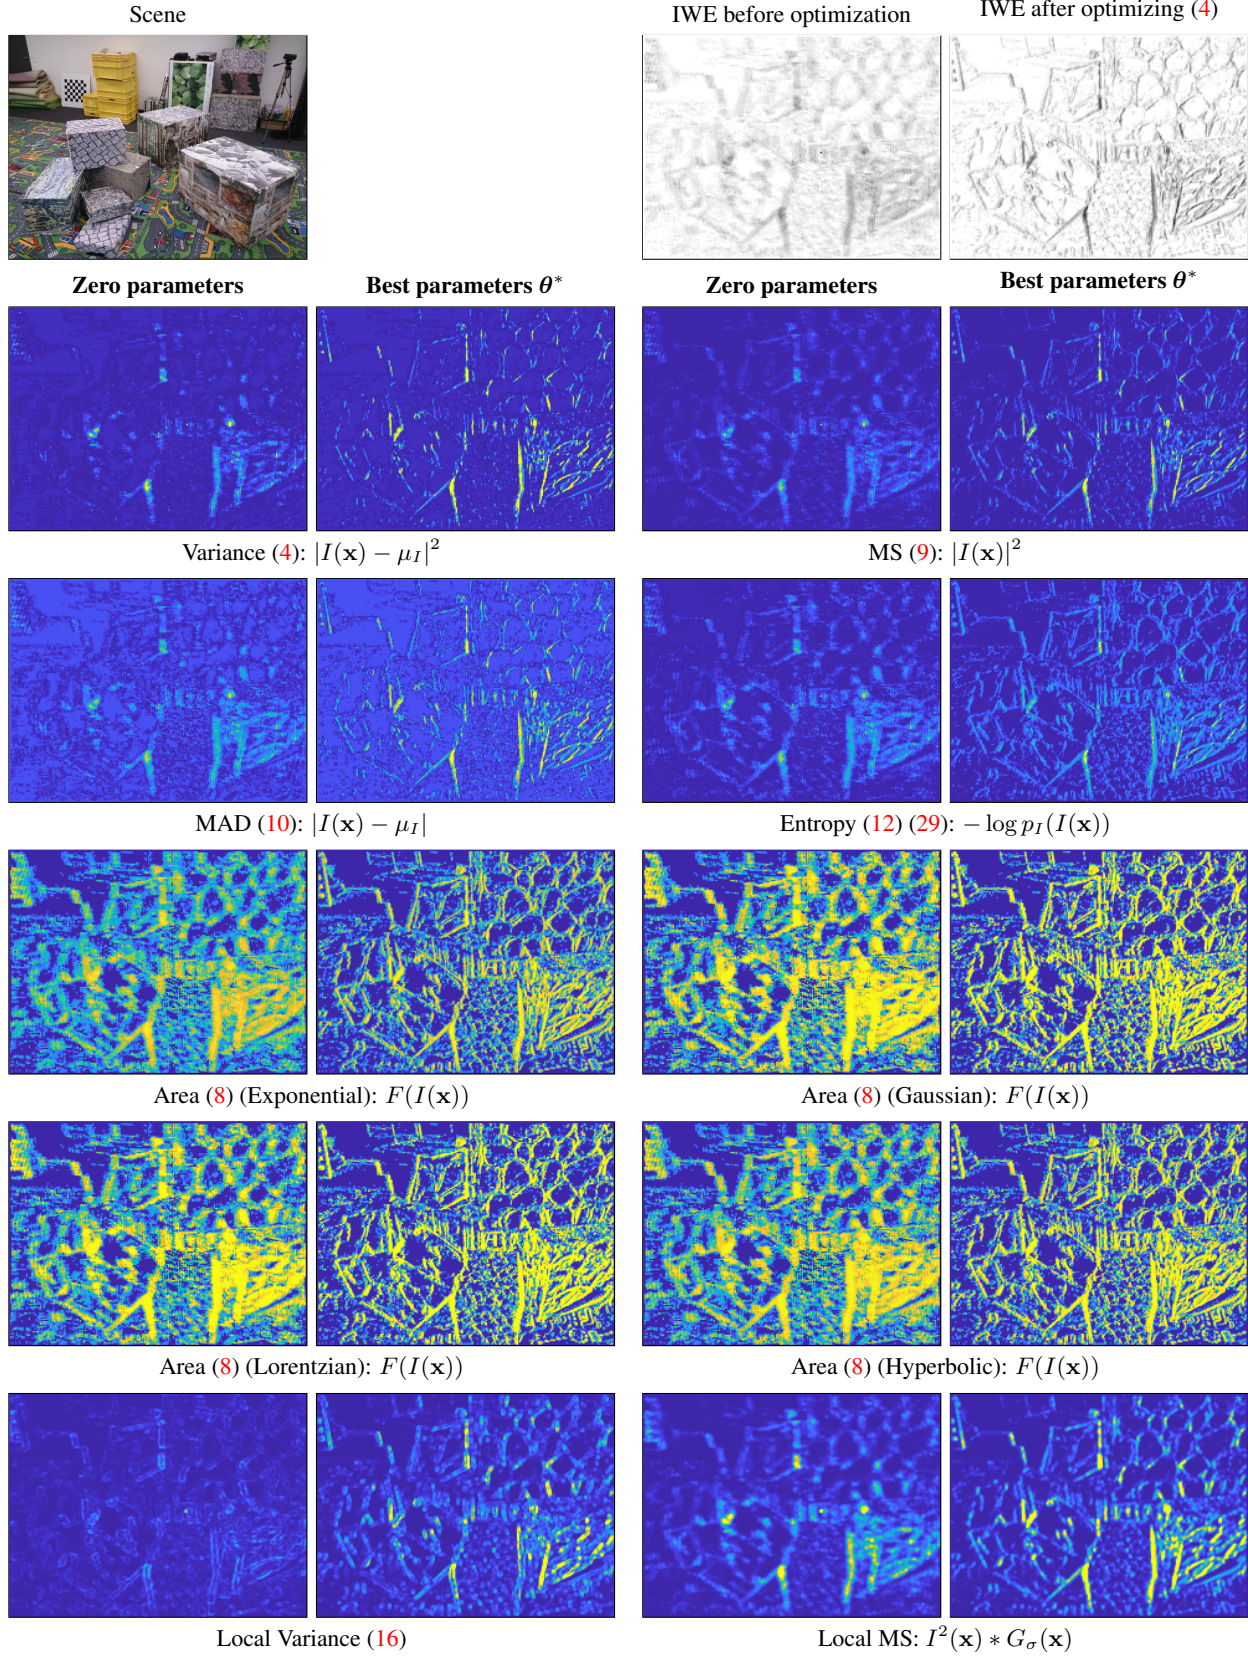

Figure 14: Visualization of the local loss (i.e., integrands of the Focus Loss Functions). Scene `boxes`, IWE not without using polarity. Same notation as Fig. 12.



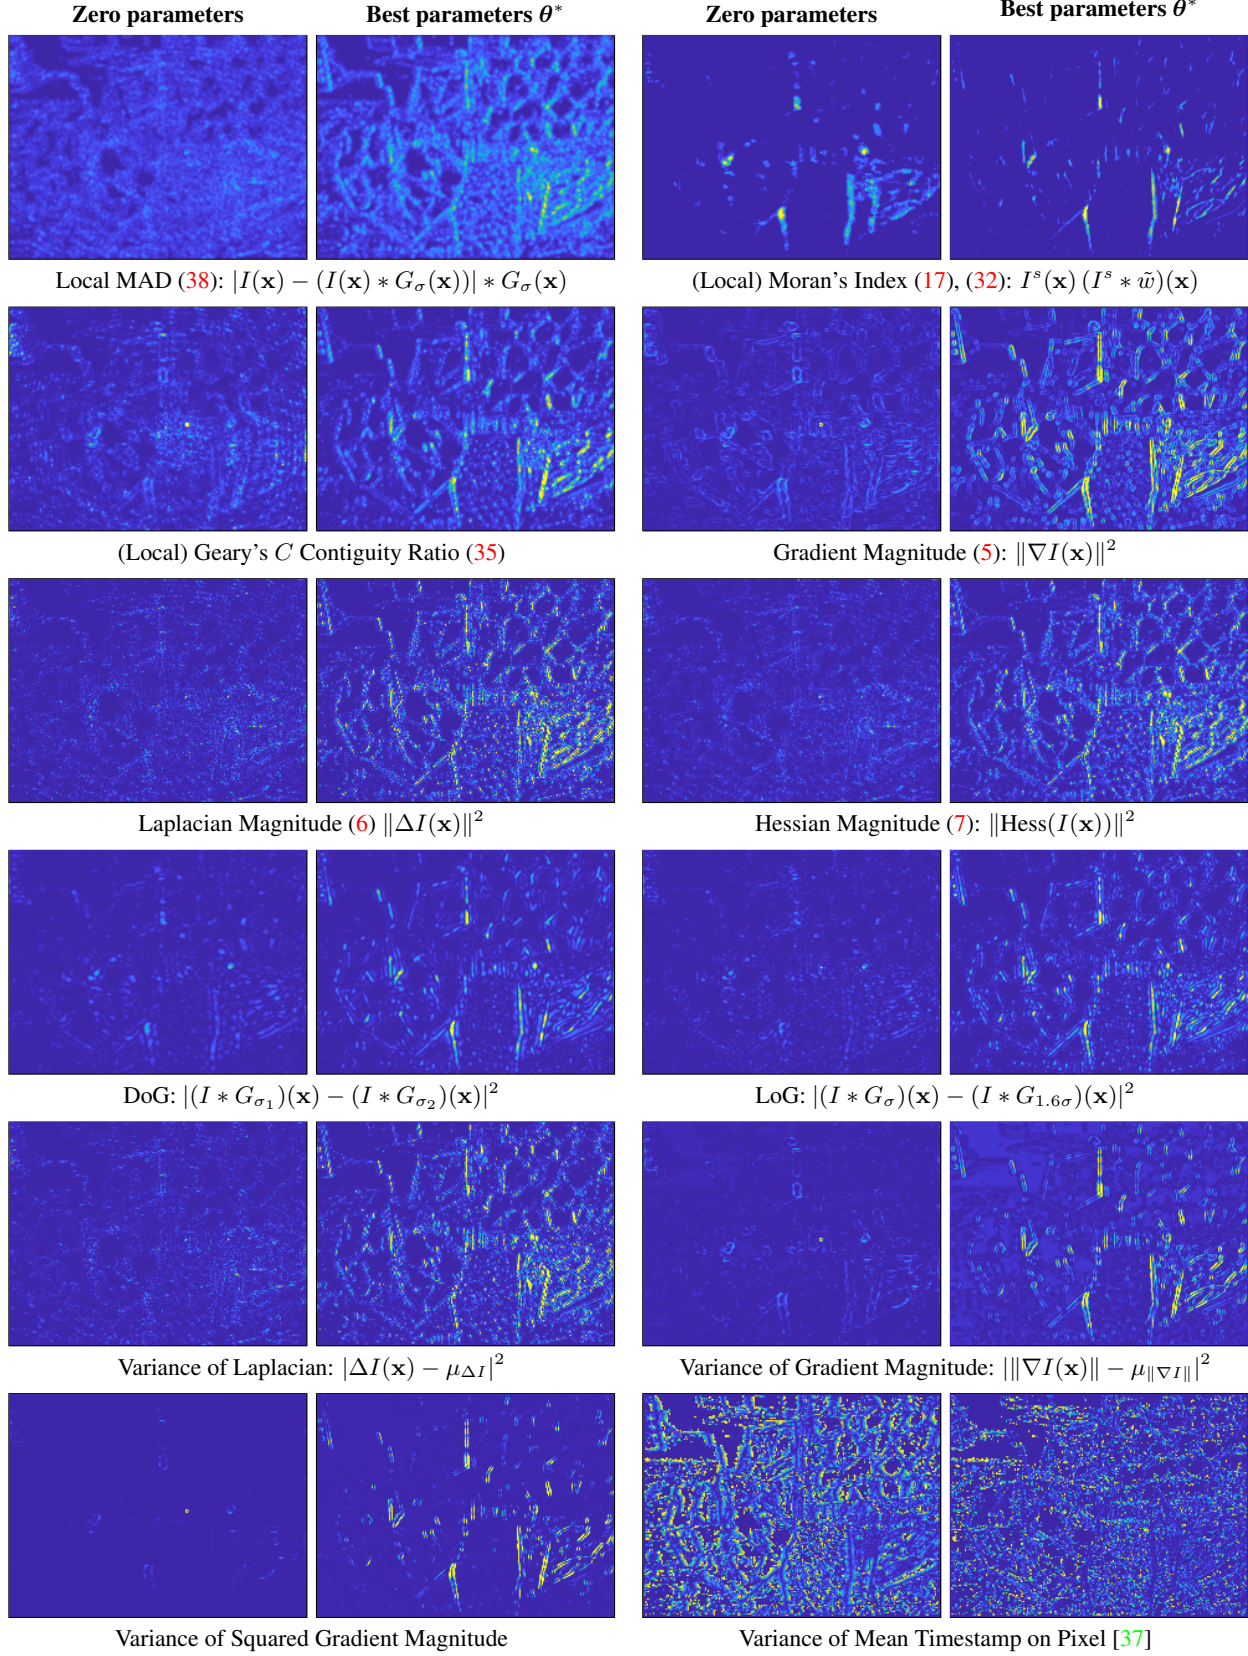

Figure 15: Visualization of local scores (i.e., integrands) of the Focus Loss Functions (continuation).

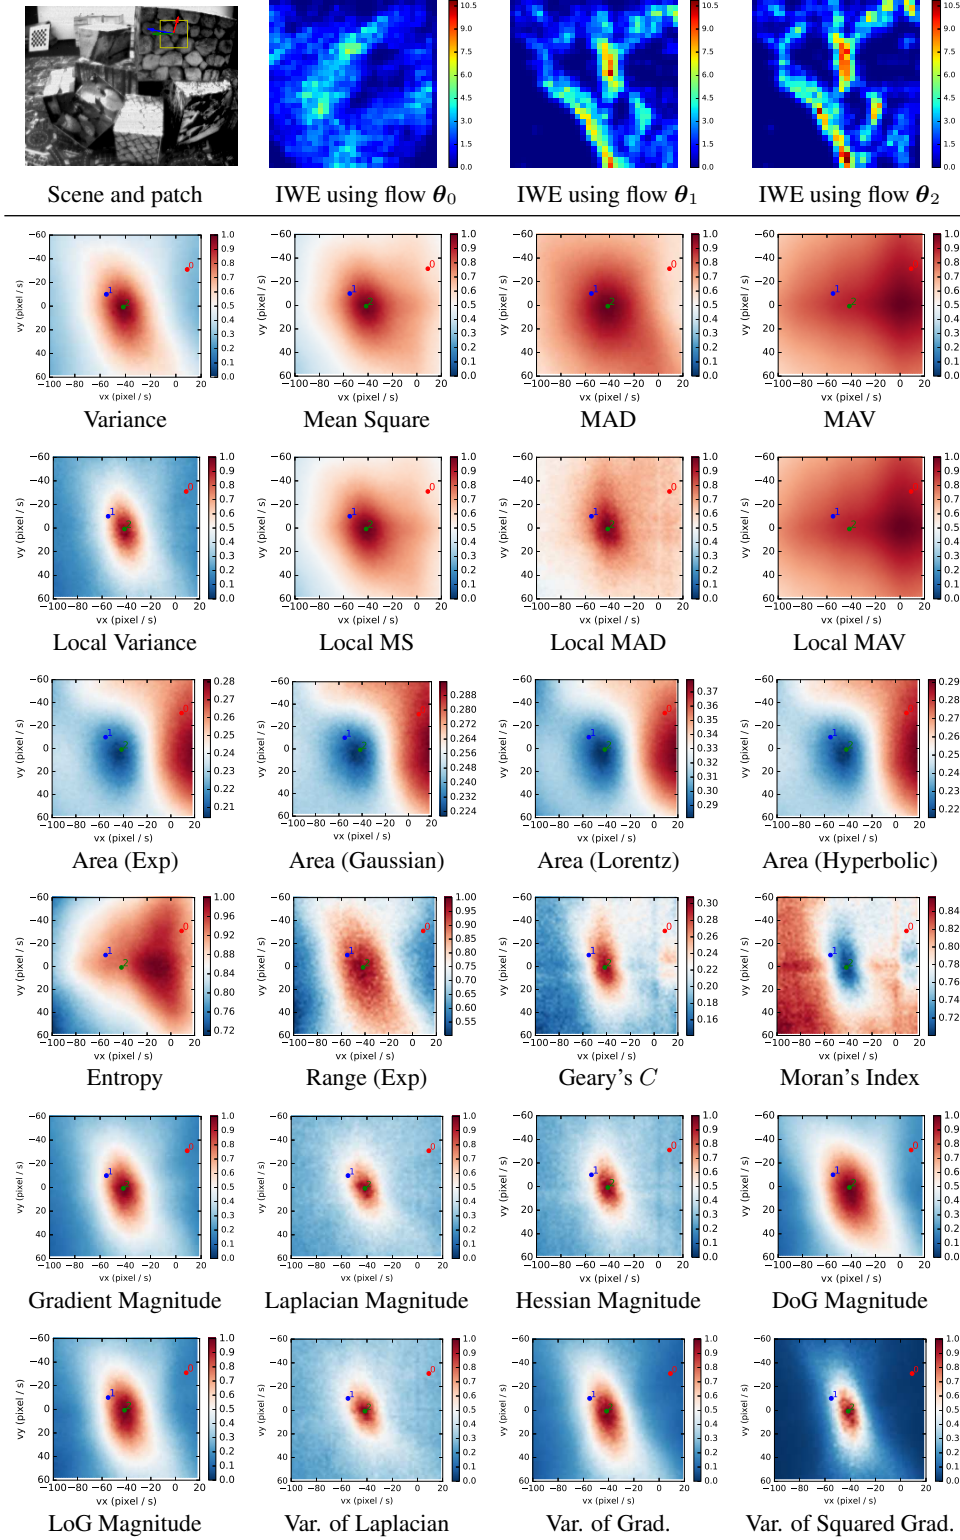

Figure 16: Visualization of the Focus Loss Functions (as heat maps, pseudo-colored from blue to red). The top-left image shows a selected patch (highlighted in yellow) and three candidate flow vectors  $\{\theta_i\}_{i=0}^2$ . The ground truth flow is close to  $\theta_2 = (-40, 0)\text{pixel/s}$ . The top row also shows the warped events (IWE patch) using the three flow vectors, without using polarity in the IWE. The remaining rows show the focus loss functions in optical flow (i.e., image velocity) space.



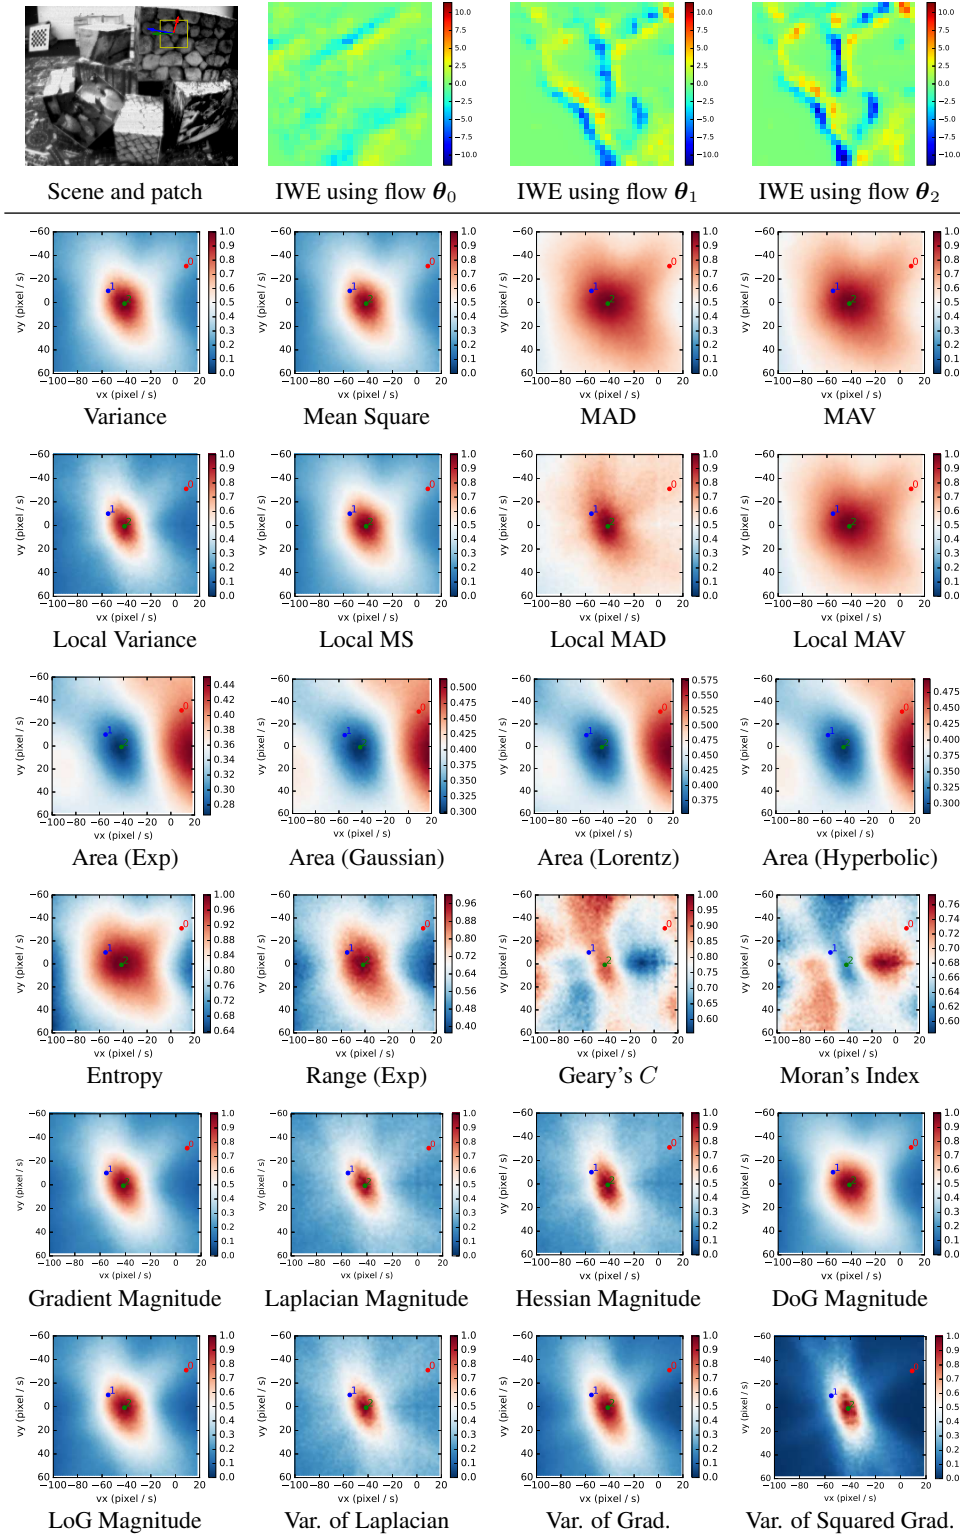

Figure 17: Visualization of the Focus Loss Functions (as heat maps, pseudo-colored from blue to red). Same notation as in Fig. 16, but using polarity in the IWE.

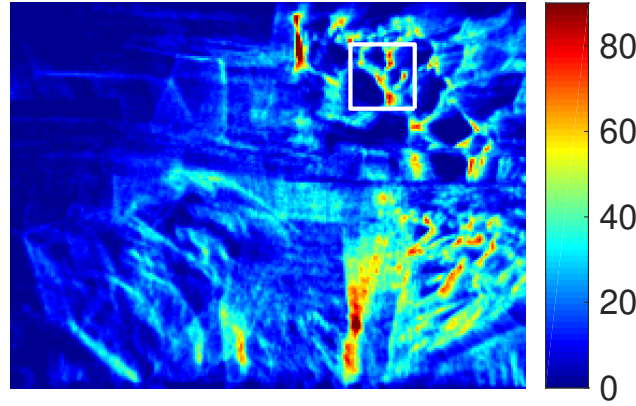

(a) Image of Warped Events IWE (i.e., slice of the Disparity Space Image (DSI) [15]) corresponding to depth  $\theta \equiv Z = 1.11$  m. Color scale represents the event count, from blue (few events) to red (many events).

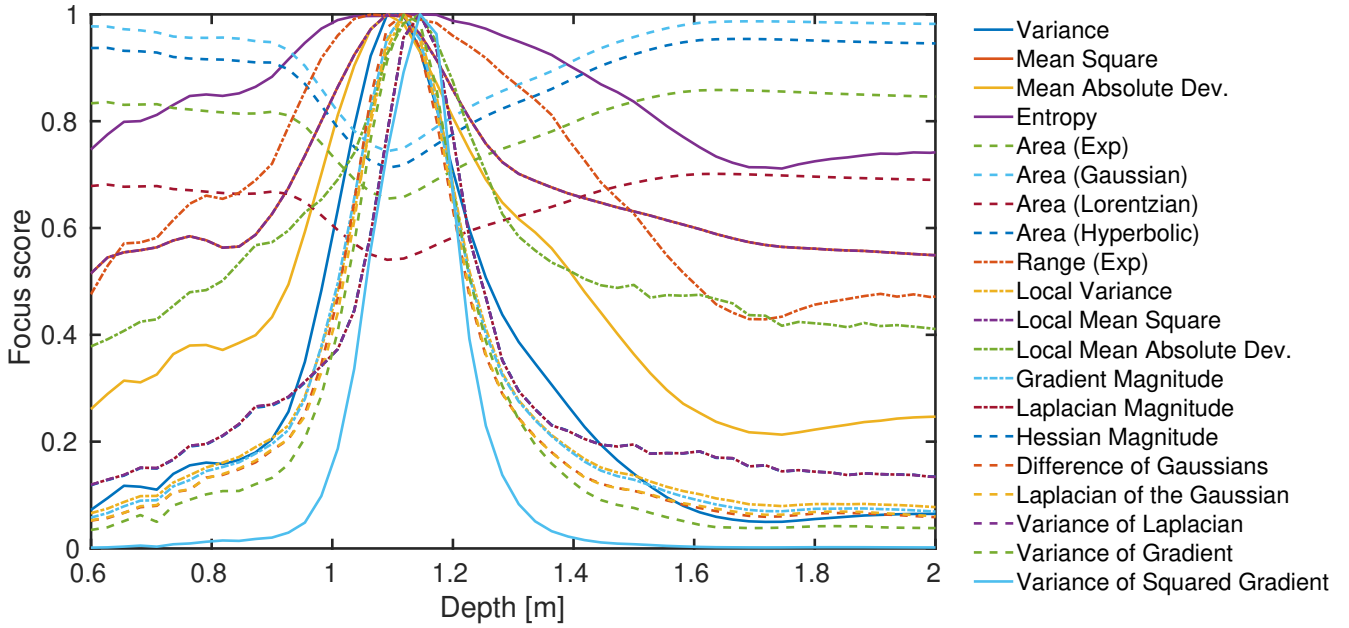

(b) Focus functions vs depth for the events corresponding to the patch highlighted in Fig. 18a.

Figure 18: *Depth Estimation*. Focus functions in Fig. 18b are shown normalized to the range  $[0, 1]$  for easier visualization.

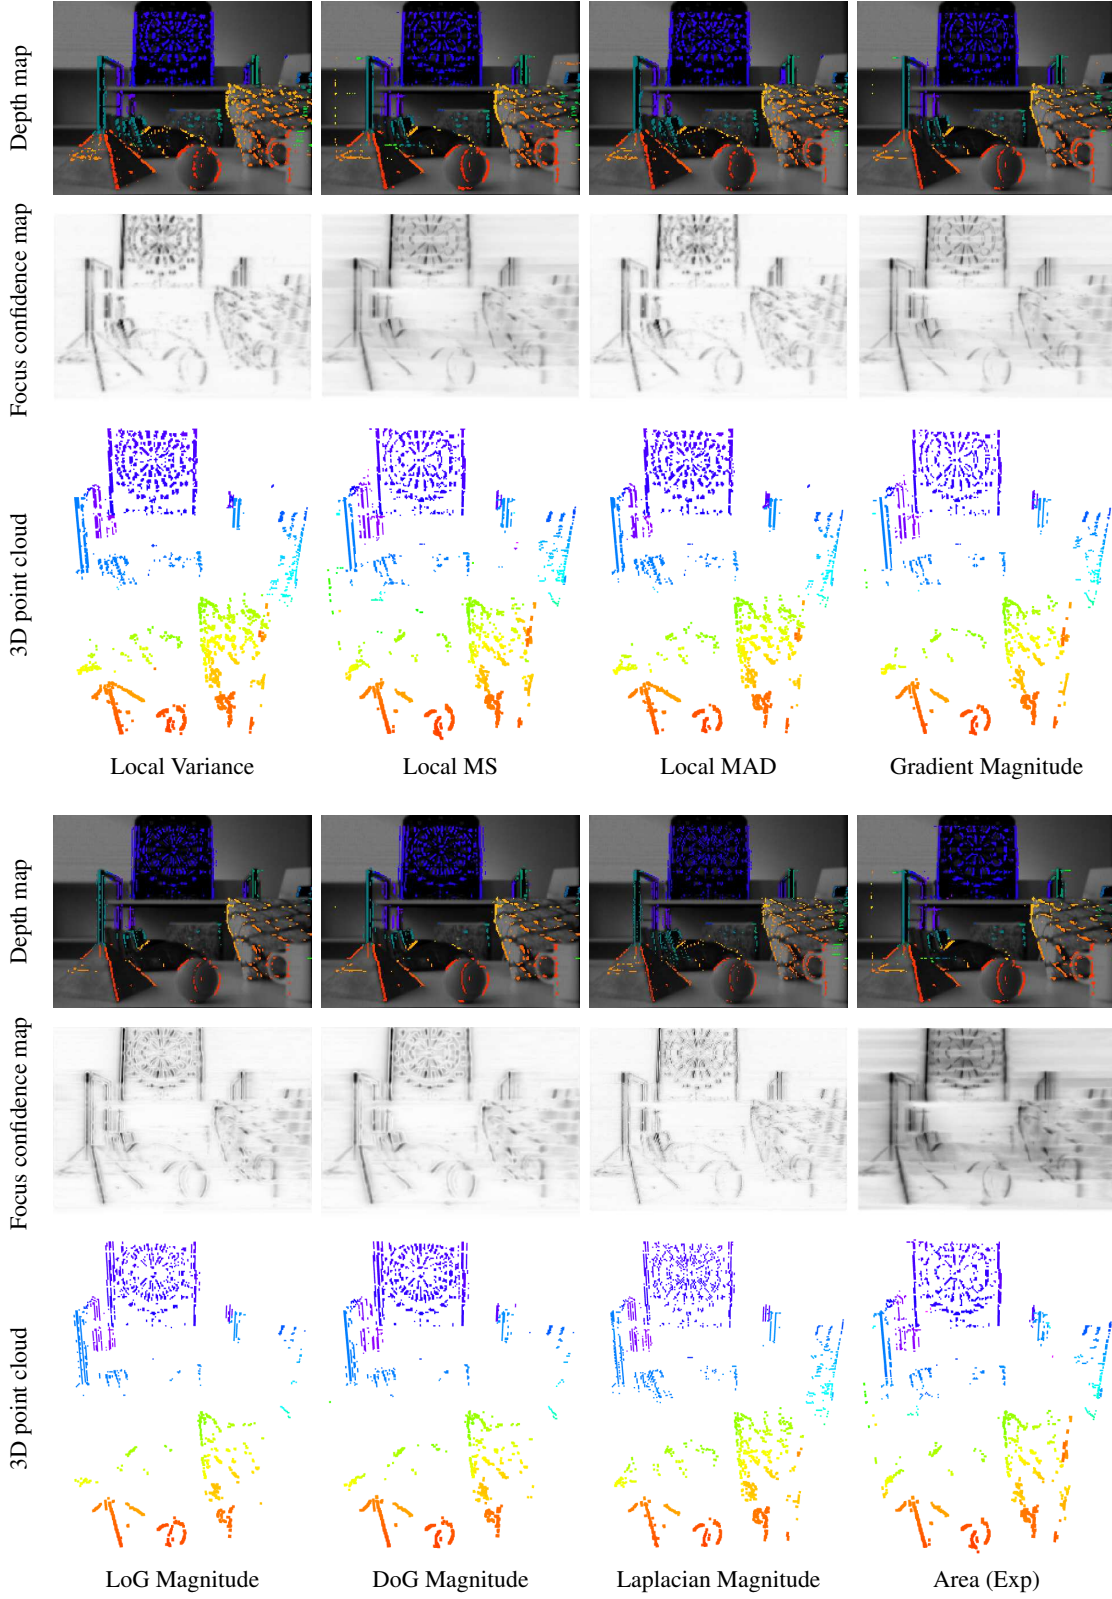

Figure 19: *3-D reconstruction* of a scene using several focus loss functions. Semi-dense depth maps (overlaid on grayscale frames) and point clouds are pseudo-colored according to depth, from red (close) to blue (far), in the range 0.45 m to 2.4 m. Sequence `slider_depth` from [45], with  $N_e = 1\,000\,000$  events over a time span of 2.93 s and a camera baseline of 85 cm.

## K. Analytical Derivatives of Focus Loss Functions

In this section, we provide the analytical derivatives of some of the focus loss functions used. A significant advantage of the proposed focus loss functions is that they are defined in terms of well-known analytical operations, and so, we can use powerful tools from Calculus to compute and simplify their derivatives. This becomes useful in the optimization framework of Fig. 1, both, for speed-up and increased accuracy over numerical derivatives.

Let the vector of parameters defining the space-time warping of events be  $\boldsymbol{\theta} = (\theta_1, \dots, \theta_M)^\top \in \mathbb{R}^M$ .

**Derivative of the IWE.** The derivative of the IWE (3) with respect to the warp parameters  $\boldsymbol{\theta}$  is, replacing the Dirac delta with an approximation, such as a Gaussian,  $\delta(\mathbf{x}) \approx \mathcal{N}(\mathbf{x}; \mathbf{0}, \epsilon^2 \text{Id})$ , and using the chain rule,

$$\frac{\partial I}{\partial \boldsymbol{\theta}} = - \sum_{k=1}^{N_e} b_k \nabla \mathcal{N}(\mathbf{x} - \mathbf{x}'_k(\boldsymbol{\theta}); \mathbf{0}, \epsilon^2 \text{Id}) \frac{\partial \mathbf{x}'_k(\boldsymbol{\theta})}{\partial \boldsymbol{\theta}}, \quad (39)$$

where  $\nabla \mathcal{N}$  is the gradient of the 2D Gaussian PDF, and the derivative of the warp is a purely geometric term:  $\frac{\partial \mathbf{x}'_k(\boldsymbol{\theta})}{\partial \boldsymbol{\theta}} = \mathbf{W}'(\mathbf{x}'_k, t_k; \boldsymbol{\theta})$ .

**Loss Function: Mean Square (MS).** The derivative of the MS, (9), is, by the chain rule,

$$\frac{\partial}{\partial \boldsymbol{\theta}} \text{MS}(I) = \frac{1}{|\Omega|} \int_{\Omega} 2I(\mathbf{x}) \frac{\partial I(\mathbf{x})}{\partial \boldsymbol{\theta}} d\mathbf{x}. \quad (40)$$

**Loss Function: Variance.** The derivative of the variance of the IWE (4) is given in [33]. Letting

$$I^c(\mathbf{x}) \doteq I(\mathbf{x}) - \mu(I) \quad (41)$$

be the centered IWE, the derivative of the variance is, by the chain rule,

$$\frac{\partial}{\partial \boldsymbol{\theta}} \text{Var}(I) = \frac{1}{|\Omega|} \int_{\Omega} 2I^c(\mathbf{x}) \frac{\partial I^c(\mathbf{x})}{\partial \boldsymbol{\theta}} d\mathbf{x}, \quad (42)$$

(formally, the same formula as (40), but with the centered IWE playing the role of the IWE in (40)) with

$$\frac{\partial I^c}{\partial \boldsymbol{\theta}} = \frac{\partial I}{\partial \boldsymbol{\theta}} - \mu \left( \frac{\partial I}{\partial \boldsymbol{\theta}} \right) \quad (43)$$

since the mean  $\mu(\cdot)$  and the derivative are linear operators, and therefore, commute. The previous result (39) may be substituted in (43).

**Loss Function: Mean Absolute Value (MAV).** Derivative of the MAV is

$$\frac{\partial}{\partial \boldsymbol{\theta}} \text{MAV}(I) = \frac{1}{|\Omega|} \int_{\Omega} \text{sign}(I(\mathbf{x})) \frac{\partial I(\mathbf{x})}{\partial \boldsymbol{\theta}} d\mathbf{x}. \quad (44)$$

From a numerical point of view, it is sensible to replace  $\text{sign}(x)$  by a smooth approximation, e.g.,  $\text{sign}(x) \approx \tanh(kx)$ , with parameter  $k \gg 1$  controlling the width of the transition around  $x = 0$  (see [53]).

**Loss Function: Mean Absolute Deviation (MAD).** The derivative of the MAD, (10), is, by the chain rule and using (43),

$$\frac{\partial}{\partial \boldsymbol{\theta}} \text{MAD}(I) = \frac{1}{|\Omega|} \int_{\Omega} \text{sign}(I^c(\mathbf{x})) \frac{\partial I^c(\mathbf{x})}{\partial \boldsymbol{\theta}} d\mathbf{x}. \quad (45)$$



**Loss Function: Entropy.** The derivative of entropy (12) is, stemming from (29),

$$\frac{\partial}{\partial \theta} H(p_I(z)) = \int_{\Omega} -\frac{1}{|\Omega|} \frac{p'_I(I(\mathbf{x}))}{p_I(I(\mathbf{x}))} \frac{\partial I(\mathbf{x})}{\partial \theta} d\mathbf{x}, \quad (46)$$

where  $p'_I(z) = dp_I/dz$ . This formula can be obtained by differentiating (29) and applying the chain rule,

$$\frac{\partial}{\partial \theta} \log p_I(I(\mathbf{x})) = \frac{p'_I(I(\mathbf{x}))}{p_I(I(\mathbf{x}))} \frac{\partial}{\partial \theta} I(\mathbf{x}). \quad (47)$$

*Implementation Details:* We approximate the density function  $p_I(z)$  by a smooth histogram of the IWE (3). First, a high-resolution histogram (e.g., 200 bins) is computed and normalized to unit area (like a PDF), and then it is smoothed by a Gaussian filter, e.g., of standard deviation  $\sigma = 5$  bins. The smoothed PDF is the convolution

$$p_I^\sigma(z) \doteq p_I(z) * \mathcal{N}(z; 0, \sigma^2), \quad (48)$$

and it is straightforward to show, using the convolution properties and interchanging the order of integration, that it is equivalent to the function obtained by replacing the Dirac delta in (28) with a smooth approximation (such as the Gaussian:  $\delta \leftarrow \mathcal{N}$ ):

$$p_I^\sigma(z) = \frac{1}{|\Omega|} \int_{\Omega} \mathcal{N}(z - I(\mathbf{x}); 0, \sigma^2) d\mathbf{x}. \quad (49)$$

Smoothing (i.e., filtering) mitigates the noise due to bin discretization and improves robustness (size of the basin of attraction) of the entropy-based focus function (12). Thus, the term in the integrand of (46) is approximated by

$$\frac{p'_I(z)}{p_I(z)} \approx \frac{(p_I^\sigma)'(z)}{p_I^\sigma(z)}, \quad (50)$$

where the derivative  $(p_I^\sigma)'$  is computed using central, finite-differences on the samples of  $p_I^\sigma(z)$ . Linear interpolation is used to interpolate the samples of  $p_I^\sigma$  and  $(p_I^\sigma)'$ .

**Loss Function: Image Area.** The derivative of the area (8) is

$$\frac{\partial}{\partial \theta} \text{supp}(I) = \int_{\Omega} \rho(I(\mathbf{x})) \frac{\partial I(\mathbf{x})}{\partial \theta} d\mathbf{x}, \quad (51)$$

with weighting functions  $\rho(\lambda)$ . See Section 3.3 for different choices (exponential, Gaussian, Lorentzian and Hyperbolic).

**Loss Function: Image Range.** The derivative of the support of the PDF of the IWE (13) is

$$\frac{\partial}{\partial \theta} \text{supp}(p_I) = \frac{1}{|\Omega|} \int_{\Omega} \rho'(p_I(I(\mathbf{x}))) \frac{\partial I(\mathbf{x})}{\partial \theta} d\mathbf{x}, \quad (52)$$

where  $\rho'(\lambda) = d\rho/d\lambda$  is the derivative of the weighting function. This can be shown using the chain rule and the derivative of the PDF of the IWE (28), expressed in terms of the derivative of the Dirac delta.

**Result: Derivative of a Convolution.** The derivative of a convolution of the IWE with a kernel  $K(\mathbf{x})$  is computed component-wise:

$$\underbrace{\frac{\partial}{\partial \theta} \underbrace{(I * K)(\mathbf{x})}_{1 \times 1}}_{1 \times M} = \left( \dots, \frac{\partial}{\partial \theta_i} (I * K)(\mathbf{x}), \dots \right) = \left( \dots, \frac{\partial I(\mathbf{x})}{\partial \theta_i} * K(\mathbf{x}), \dots \right) = \underbrace{\frac{\partial I(\mathbf{x})}{\partial \theta}}_{1 \times M} * \underbrace{K(\mathbf{x})}_{1 \times 1}. \quad (53)$$

**Loss Function: Local MS.** The derivative of the aggregated local MS of the IWE is, by the chain rule and (53),

$$\frac{\partial}{\partial \theta} \int_{\Omega} I^2(\mathbf{x}) * G_{\sigma}(\mathbf{x}) d\mathbf{x} = \int_{\Omega} \left( 2I(\mathbf{x}) \frac{\partial I(\mathbf{x})}{\partial \theta} \right) * G_{\sigma}(\mathbf{x}) d\mathbf{x}. \quad (54)$$

**Loss Function: Local Variance.** The derivative of the aggregated local variance of the IWE is, by the chain rule on (14),

$$\frac{\partial}{\partial \boldsymbol{\theta}} \int_{\Omega} \text{Var}(\mathbf{x}; I) d\mathbf{x} = \int_{\Omega} \frac{\partial}{\partial \boldsymbol{\theta}} \text{Var}(\mathbf{x}; I) d\mathbf{x}, \quad (55)$$

where, using (16) and result (53), the integrand becomes

$$\frac{\partial}{\partial \boldsymbol{\theta}} \text{Var}(\mathbf{x}; I) \stackrel{(16)}{\approx} \left( 2I(\mathbf{x}) \frac{\partial I(\mathbf{x})}{\partial \boldsymbol{\theta}} \right) * G_{\sigma}(\mathbf{x}) - 2(I(\mathbf{x}) * G_{\sigma}(\mathbf{x})) \left( \frac{\partial I(\mathbf{x})}{\partial \boldsymbol{\theta}} * G_{\sigma}(\mathbf{x}) \right). \quad (56)$$

**Loss Function: Local MAV.** The derivative of the aggregated local MAV of the IWE is, using the chain rule and the compact notation (53),

$$\frac{\partial}{\partial \boldsymbol{\theta}} \int_{\Omega} |I(\mathbf{x})| * G_{\sigma}(\mathbf{x}) d\mathbf{x} = \int_{\Omega} \left( \text{sign}(I(\mathbf{x})) \frac{\partial I(\mathbf{x})}{\partial \boldsymbol{\theta}} \right) * G_{\sigma}(\mathbf{x}) d\mathbf{x}. \quad (57)$$

**Loss Function: Local MAD.** Letting  $I^c(\mathbf{x}) \doteq I(\mathbf{x}) - \mu(I)(\mathbf{x})$  be the locally-centered IWE, with local mean  $\mu(I)(\mathbf{x}) \doteq I(\mathbf{x}) * G_{\sigma}(\mathbf{x})$ , the derivative of the aggregated local MAD of the IWE is, using the chain rule and the compact notation (53),

$$\frac{\partial}{\partial \boldsymbol{\theta}} \int_{\Omega} |I^c(\mathbf{x})| * G_{\sigma}(\mathbf{x}) d\mathbf{x} = \int_{\Omega} \left( \text{sign}(I^c(\mathbf{x})) \frac{\partial I^c(\mathbf{x})}{\partial \boldsymbol{\theta}} \right) * G_{\sigma}(\mathbf{x}) d\mathbf{x}, \quad (58)$$

with derivative of the locally-centered IWE

$$\frac{\partial I^c(\mathbf{x})}{\partial \boldsymbol{\theta}} = \frac{\partial I(\mathbf{x})}{\partial \boldsymbol{\theta}} - \mu \left( \frac{\partial I}{\partial \boldsymbol{\theta}} \right) (\mathbf{x}) \quad (59)$$

since the local mean and the derivative are linear operators, and hence, commute.

**Loss Function: Gradient Magnitude.** The derivative of the squared magnitude of the gradient of the IWE (5) is

$$\frac{\partial}{\partial \boldsymbol{\theta}} \|\nabla I\|_{L^2(\Omega)}^2 = \int_{\Omega} 2(\nabla I(\mathbf{x}))^{\top} \frac{\partial \nabla I(\mathbf{x})}{\partial \boldsymbol{\theta}} d\mathbf{x}, \quad (60)$$

with  $2 \times M$  matrix (assuming equality of mixed derivatives by Schwarz's theorem),

$$\frac{\partial \nabla I(\mathbf{x})}{\partial \boldsymbol{\theta}} = \begin{pmatrix} \frac{\partial}{\partial \boldsymbol{\theta}} I_x \\ \frac{\partial}{\partial \boldsymbol{\theta}} I_y \end{pmatrix} = \begin{pmatrix} \frac{\partial}{\partial x} \frac{\partial I}{\partial \boldsymbol{\theta}} \\ \frac{\partial}{\partial y} \frac{\partial I}{\partial \boldsymbol{\theta}} \end{pmatrix}. \quad (61)$$

Hence, (60) becomes

$$(60) = \int_{\Omega} 2 \left( I_x(\mathbf{x}) \frac{\partial}{\partial x} \left( \frac{\partial I(\mathbf{x})}{\partial \boldsymbol{\theta}} \right) + I_y(\mathbf{x}) \frac{\partial}{\partial y} \left( \frac{\partial I(\mathbf{x})}{\partial \boldsymbol{\theta}} \right) \right) d\mathbf{x}. \quad (62)$$

**Loss Function: Laplacian Magnitude.** Following similar steps as for the gradient magnitude, the derivative of the magnitude of the Laplacian of the IWE (6) is

$$\frac{\partial}{\partial \boldsymbol{\theta}} \|\Delta I\|_{L^2(\Omega)}^2 = \int_{\Omega} 2\Delta I(\mathbf{x}) \Delta \left( \frac{\partial I(\mathbf{x})}{\partial \boldsymbol{\theta}} \right) d\mathbf{x}. \quad (63)$$

where we defined

$$\Delta \left( \frac{\partial I(\mathbf{x})}{\partial \boldsymbol{\theta}} \right) \doteq \frac{\partial^2}{\partial x^2} \left( \frac{\partial I(\mathbf{x})}{\partial \boldsymbol{\theta}} \right) + \frac{\partial^2}{\partial y^2} \left( \frac{\partial I(\mathbf{x})}{\partial \boldsymbol{\theta}} \right). \quad (64)$$

**Loss Function: Hessian Magnitude.** The derivative of Hessian magnitude (7) is

$$\frac{\partial}{\partial \theta} \|\text{Hess}(I)\|_{L^2(\Omega)}^2 = \sum_{i,j} \frac{\partial}{\partial \theta} \|I_{x_i x_j}\|_{L^2(\Omega)}^2, \quad (65)$$

where  $x_i, x_j$  are variables  $x, y$  of the image plane. Using once more Schwarz's theorem to swap the differentiation order, each of the four terms in the sum (65) is

$$\frac{\partial}{\partial \theta} \|I_{x_i x_j}\|_{L^2(\Omega)}^2 = \int_{\Omega} 2I_{x_i x_j}(\mathbf{x}) \left( \frac{\partial I(\mathbf{x})}{\partial \theta} \right)_{x_i x_j} d\mathbf{x}, \quad (66)$$

where subscripts  $x_i, x_j$  indicate differentiation with respect to those variables.

**Loss Function: Difference of Gaussians (DoG).** The derivative of the squared difference of Gaussians applied to the IWE can be written in a compact way, using (53) on the  $\text{DoG}(\mathbf{x}) \doteq (G_{\sigma_1} - G_{\sigma_2})(\mathbf{x})$  filter, with  $\sigma_1 > \sigma_2$ , as

$$\frac{\partial}{\partial \theta} \int_{\Omega} (I(\mathbf{x}) * \text{DoG}(\mathbf{x}))^2 d\mathbf{x} = \int_{\Omega} 2(I(\mathbf{x}) * \text{DoG}(\mathbf{x})) \left( \frac{\partial I(\mathbf{x})}{\partial \theta} * \text{DoG}(\mathbf{x}) \right) d\mathbf{x}, \quad (67)$$

In expanded form,

$$\frac{\partial}{\partial \theta} \int_{\Omega} (I(\mathbf{x}) * \text{DoG}(\mathbf{x}))^2 d\mathbf{x} = \int_{\Omega} 2((I * G_{\sigma_1})(\mathbf{x}) - (I * G_{\sigma_2})(\mathbf{x})) \left( \frac{\partial I(\mathbf{x})}{\partial \theta} * G_{\sigma_1}(\mathbf{x}) - \frac{\partial I(\mathbf{x})}{\partial \theta} * G_{\sigma_2}(\mathbf{x}) \right) d\mathbf{x} \quad (68)$$

In the experiments, we used  $\sigma_1 = 1$  pixel and  $\sigma_2 = 3\sigma_1$ .

**Loss Function: Laplacian of the Gaussian (LoG).** The derivative of the squared difference of the Laplacian of the Gaussian of the IWE can be computed from the formula for the DoG, using the fact that the DoG approximates the LoG if  $\sigma_2 \approx 1.6\sigma_1$ .

**Loss Function: Variance of the Laplacian.** Derivative of the variance of the Laplacian:

$$\text{Var}(\Delta I) \doteq \frac{1}{|\Omega|} \int_{\Omega} (\Delta I(\mathbf{x}) - \mu_{\Delta I})^2 d\mathbf{x}, \quad (69)$$

where the mean is  $\mu_{\Delta I} \doteq \frac{1}{|\Omega|} \int_{\Omega} \Delta I(\mathbf{x}) d\mathbf{x}$ . The derivative of (69) with respect to the parameters  $\theta$  is, using (64),

$$\frac{\partial}{\partial \theta} \text{Var}(\Delta I) = \frac{1}{|\Omega|} \int_{\Omega} 2(\Delta I - \mu_{\Delta I}) \left( \Delta \left( \frac{\partial I}{\partial \theta} \right) - \mu \left( \Delta \left( \frac{\partial I}{\partial \theta} \right) \right) \right) d\mathbf{x}. \quad (70)$$

**Loss Function: Variance of the Squared Gradient Magnitude.** The derivative of the variance of the squared gradient magnitude

$$\text{Var}(\|\nabla I\|^2) \doteq \frac{1}{|\Omega|} \int_{\Omega} (\|\nabla I(\mathbf{x})\|^2 - \mu_{\|\nabla I\|^2})^2 d\mathbf{x}, \quad (71)$$

with mean  $\mu_{\|\nabla I\|^2} \doteq \frac{1}{|\Omega|} \int_{\Omega} \|\nabla I(\mathbf{x})\|^2 d\mathbf{x}$ , is, using (61),

$$\frac{\partial}{\partial \theta} \text{Var}(\|\nabla I\|^2) = \frac{1}{|\Omega|} \int_{\Omega} 2(\|\nabla I\|^2 - \mu_{\|\nabla I\|^2}) \left( 2(\nabla I)^{\top} \frac{\partial \nabla I}{\partial \theta} - \mu \left( 2(\nabla I)^{\top} \frac{\partial \nabla I}{\partial \theta} \right) \right) d\mathbf{x} \quad (72)$$

**Loss Function: Variance of the Gradient Magnitude.** Derivative of the variance of the gradient magnitude

$$\text{Var}(\|\nabla I\|) \doteq \frac{1}{|\Omega|} \int_{\Omega} (\|\nabla I(\mathbf{x})\| - \mu_{\|\nabla I\|})^2 d\mathbf{x}, \quad (73)$$

with mean  $\mu_{\|\nabla I\|} \doteq \frac{1}{|\Omega|} \int_{\Omega} \|\nabla I(\mathbf{x})\| d\mathbf{x}$ , is, also using (61),

$$\frac{\partial}{\partial \theta} \text{Var}(\|\nabla I\|) = \frac{1}{|\Omega|} \int_{\Omega} 2(\|\nabla I\| - \mu_{\|\nabla I\|}) \left( \frac{(\nabla I)^{\top}}{\|\nabla I\|} \frac{\partial \nabla I}{\partial \theta} - \mu \left( \frac{(\nabla I)^{\top}}{\|\nabla I\|} \frac{\partial \nabla I}{\partial \theta} \right) \right) d\mathbf{x}. \quad (74)$$

## References

- [1] Patrick Lichtsteiner, Christoph Posch, and Tobi Delbruck, "A  $128 \times 128$  120 dB 15  $\mu$ s latency asynchronous temporal contrast vision sensor," *IEEE J. Solid-State Circuits*, vol. 43, no. 2, pp. 566–576, 2008. [1](#), [2](#)
- [2] Zhenjiang Ni, Sio-Hoi Ieng, Christoph Posch, Stéphane Régnier, and Ryad Benosman, "Visual tracking using neuromorphic asynchronous event-based cameras," *Neural Computation*, vol. 27, no. 4, pp. 925–953, 2015. [1](#)
- [3] Daniel Gehrig, Henri Rebecq, Guillermo Gallego, and Davide Scaramuzza, "Asynchronous, photometric feature tracking using events and frames," in *Eur. Conf. Comput. Vis. (ECCV)*, 2018. [1](#)
- [4] Elias Mueggler, Basil Huber, and Davide Scaramuzza, "Event-based, 6-DOF pose tracking for high-speed maneuvers," in *IEEE/RSJ Int. Conf. Intell. Robot. Syst. (IROS)*, pp. 2761–2768, 2014. [1](#)
- [5] Andrea Censi and Davide Scaramuzza, "Low-latency event-based visual odometry," in *IEEE Int. Conf. Robot. Autom. (ICRA)*, pp. 703–710, 2014. [1](#)
- [6] Guillermo Gallego, Jon E. A. Lund, Elias Mueggler, Henri Rebecq, Tobi Delbruck, and Davide Scaramuzza, "Event-based, 6-DOF camera tracking from photometric depth maps," *IEEE Trans. Pattern Anal. Mach. Intell.*, vol. 40, pp. 2402–2412, Oct. 2018. [1](#)
- [7] David Tedaldi, Guillermo Gallego, Elias Mueggler, and Davide Scaramuzza, "Feature detection and tracking with the dynamic and active-pixel vision sensor (DAVIS)," in *Int. Conf. Event-Based Control, Comm. Signal Proc. (EBCCSP)*, 2016. [1](#)
- [8] Arren Glover and Chiara Bartolozzi, "Robust visual tracking with a freely-moving event camera," in *IEEE/RSJ Int. Conf. Intell. Robot. Syst. (IROS)*, pp. 3769–3776, 2017. [1](#)
- [9] Ignacio Alzugaray and Margarita Chli, "Asynchronous corner detection and tracking for event cameras in real time," *IEEE Robot. Autom. Lett.*, vol. 3, pp. 3177–3184, Oct. 2018. [1](#)
- [10] Paul Rogister, Ryad Benosman, Sio-Hoi Ieng, Patrick Lichtsteiner, and Tobi Delbruck, "Asynchronous event-based binocular stereo matching," *IEEE Trans. Neural Netw. Learn. Syst.*, vol. 23, no. 2, pp. 347–353, 2012. [1](#)
- [11] Stephan Schraml, Ahmed Nabil Belbachir, and Horst Bischof, "Event-driven stereo matching for real-time 3D panoramic vision," in *IEEE Conf. Comput. Vis. Pattern Recog. (CVPR)*, pp. 466–474, 2015. [1](#)
- [12] Nathan Matsuda, Oliver Cossairt, and Mohit Gupta, "MC3D: Motion contrast 3D scanning," in *IEEE Int. Conf. Comput. Photography (ICCP)*, pp. 1–10, 2015. [1](#)
- [13] Dongqing Zou, Ping Guo, Qiang Wang, Xiaotao Wang, Guangqi Shao, Feng Shi, Jia Li, and Paul-K. J. Park, "Context-aware event-driven stereo matching," in *IEEE Int. Conf. Image Process. (ICIP)*, pp. 1076–1080, 2016. [1](#)
- [14] Marc Osswald, Sio-Hoi Ieng, Ryad Benosman, and Giacomo Indiveri, "A spiking neural network model of 3D perception for event-based neuromorphic stereo vision systems," *Scientific Reports*, vol. 7, Jan. 2017. [1](#)
- [15] Henri Rebecq, Guillermo Gallego, Elias Mueggler, and Davide Scaramuzza, "EMVS: Event-based multi-view stereo—3D reconstruction with an event camera in real-time," *Int. J. Comput. Vis.*, vol. 126, pp. 1394–1414, Dec. 2018. [1](#), [7](#), [14](#), [22](#)
- [16] Zhen Xie, Shengyong Chen, and Garrick Orchard, "Event-based stereo depth estimation using belief propagation," *Front. Neurosci.*, vol. 11, Oct. 2017. [1](#)
- [17] Alexander Andreopoulos, Hirak J. Kashyap, Tapan K. Nayak, Arnon Amir, and Myron D. Flickner, "A low power, high throughput, fully event-based stereo system," in *IEEE Conf. Comput. Vis. Pattern Recog. (CVPR)*, pp. 7532–7542, 2018. [1](#)
- [18] Yi Zhou, Guillermo Gallego, Henri Rebecq, Laurent Kneip, Hongdong Li, and Davide Scaramuzza, "Semi-dense 3D reconstruction with a stereo event camera," in *Eur. Conf. Comput. Vis. (ECCV)*, pp. 242–258, 2018. [1](#)
- [19] Alex Zihao Zhu, Yibo Chen, and Kostas Daniilidis, "Real-time time synchronized event-based stereo," in *Eur. Conf. Comput. Vis. (ECCV)*, pp. 438–452, 2018. [1](#)
- [20] David Weikersdorfer, Raoul Hoffmann, and Jörg Conradt, "Simultaneous localization and mapping for event-based vision systems," in *Int. Conf. Comput. Vis. Syst. (ICVS)*, pp. 133–142, 2013. [1](#)
- [21] Hanme Kim, Ankur Handa, Ryad Benosman, Sio-Hoi Ieng, and Andrew J. Davison, "Simultaneous mosaicing and tracking with an event camera," in *British Mach. Vis. Conf. (BMVC)*, 2014. [1](#)
- [22] Hanme Kim, Stefan Leutenegger, and Andrew J. Davison, "Real-time 3D reconstruction and 6-DoF tracking with an event camera," in *Eur. Conf. Comput. Vis. (ECCV)*, pp. 349–364, 2016. [1](#)
- [23] Henri Rebecq, Timo Horstschäfer, Guillermo Gallego, and Davide Scaramuzza, "EVO: A geometric approach to event-based 6-DOF parallel tracking and mapping in real-time," *IEEE Robot. Autom. Lett.*, vol. 2, no. 2, pp. 593–600, 2017. [1](#), [15](#)
- [24] Christian Reinbacher, Gottfried Munda, and Thomas Pock, "Real-time panoramic tracking for event cameras," in *IEEE Int. Conf. Comput. Photography (ICCP)*, pp. 1–9, 2017. [1](#)
- [25] Alex Zihao Zhu, Nikolay Atanasov, and Kostas Daniilidis, "Event-based visual inertial odometry," in *IEEE Conf. Comput. Vis. Pattern Recog. (CVPR)*, pp. 5816–5824, 2017. [1](#)
- [26] Antoni Rosinol Vidal, Henri Rebecq, Timo Horstschäfer, and Davide Scaramuzza, "Ultimate SLAM? combining events, images, and IMU for robust visual SLAM in HDR and high speed scenarios," *IEEE Robot. Autom. Lett.*, vol. 3, pp. 994–1001, Apr. 2018. [1](#)
- [27] Elias Mueggler, Guillermo Gallego, Henri Rebecq, and Davide Scaramuzza, "Continuous-time visual-inertial odometry for event cameras," *IEEE Trans. Robot.*, vol. 34, pp. 1425–1440, Dec. 2018. [1](#)
- [28] Jun Haeng Lee, Tobi Delbruck, Michael Pfeiffer, Paul K.J. Park, Chang-Woo Shin, Hyunsurk Ryu, and Byung Chang Kang, "Real-time gesture interface based on event-driven processing from stereo silicon retinas," *IEEE Trans. Neural Netw. Learn. Syst.*, vol. 25, no. 12, pp. 2250–2263, 2014. [1](#)



- [29] Garrick Orchard, Cedric Meyer, Ralph Etienne-Cummings, Christoph Posch, Nitish Thakor, and Ryad Benosman, "HFirst: A temporal approach to object recognition," *IEEE Trans. Pattern Anal. Mach. Intell.*, vol. 37, no. 10, pp. 2028–2040, 2015. [1](#)
- [30] Xavier Lagorce, Garrick Orchard, Francesco Gallupi, Bertram E. Shi, and Ryad Benosman, "HOTS: A hierarchy of event-based time-surfaces for pattern recognition," *IEEE Trans. Pattern Anal. Mach. Intell.*, vol. 39, pp. 1346–1359, July 2017. [1](#)
- [31] Arnon Amir, Brian Taba, David Berg, Timothy Melano, Jeffrey McKinstry, Carmelo Di Nolfo, Tapan Nayak, Alexander Andreopoulos, Guillaume Garreau, Marcela Mendoza, Jeff Kusnitz, Michael Debole, Steve Esser, Tobi Delbruck, Myron Flickner, and Dharmendra Modha, "A low power, fully event-based gesture recognition system," in *IEEE Conf. Comput. Vis. Pattern Recog. (CVPR)*, pp. 7388–7397, 2017. [1](#)
- [32] Amos Sironi, Manuele Brambilla, Nicolas Bourdis, Xavier Lagorce, and Ryad Benosman, "HATS: Histograms of averaged time surfaces for robust event-based object classification," in *IEEE Conf. Comput. Vis. Pattern Recog. (CVPR)*, pp. 1731–1740, 2018. [1](#)
- [33] Guillermo Gallego and Davide Scaramuzza, "Accurate angular velocity estimation with an event camera," *IEEE Robot. Autom. Lett.*, vol. 2, no. 2, pp. 632–639, 2017. [1](#), [2](#), [3](#), [7](#), [14](#), [15](#), [24](#)
- [34] Alex Zihao Zhu, Nikolay Atanasov, and Kostas Daniilidis, "Event-based feature tracking with probabilistic data association," in *IEEE Int. Conf. Robot. Autom. (ICRA)*, pp. 4465–4470, 2017. [1](#)
- [35] Guillermo Gallego, Henri Rebecq, and Davide Scaramuzza, "A unifying contrast maximization framework for event cameras, with applications to motion, depth, and optical flow estimation," in *IEEE Conf. Comput. Vis. Pattern Recog. (CVPR)*, pp. 3867–3876, 2018. [1](#), [2](#), [3](#), [7](#), [11](#), [14](#), [15](#)
- [36] Timo Stoffregen and Lindsay Kleeman, "Simultaneous optical flow and segmentation (SOFAS) using Dynamic Vision Sensor," in *Australasian Conf. Robot. Autom. (ACRA)*, 2017. [1](#), [2](#), [7](#), [14](#), [15](#)
- [37] Anton Mitrokhin, Cornelia Fermuller, Chethan Parameshwara, and Yiannis Aloimonos, "Event-based moving object detection and tracking," in *IEEE/RSJ Int. Conf. Intell. Robot. Syst. (IROS)*, 2018. [1](#), [2](#), [7](#), [8](#), [14](#), [15](#), [17](#), [19](#)
- [38] Chengxi Ye, Anton Mitrokhin, Chethan Parameshwara, Cornelia Fermüller, James A. Yorke, and Yiannis Aloimonos, "Unsupervised learning of dense optical flow and depth from sparse event data," *arXiv preprint arXiv:1809.08625*, 2018. [1](#)
- [39] Alex Zihao Zhu, Liangzhe Yuan, Kenneth Chaney, and Kostas Daniilidis, "Unsupervised event-based learning of optical flow, depth, and egomotion," *arXiv preprint arXiv:1812.08156*, 2018. [1](#), [8](#)
- [40] Timo Stoffregen, Guillermo Gallego, Tom Drummond, Lindsay Kleeman, and Davide Scaramuzza, "Event-based motion segmentation by motion compensation," *arXiv preprint arXiv:1904.01293*, 2019. [1](#), [7](#)
- [41] Anton Mitrokhin, Chengxi Ye, Cornelia Fermuller, Yiannis Aloimonos, and Tobi Delbruck, "EV-IMO: Motion segmentation dataset and learning pipeline for event cameras," *arXiv preprint arXiv:1903.07520*, 2019. [1](#)
- [42] Timo Stoffregen and Lindsay Kleeman, "Event cameras, contrast maximization and reward functions: an analysis," in *IEEE Conf. Comput. Vis. Pattern Recog. (CVPR)*, 2019. [1](#)
- [43] Parikshit Sakurikar and P. J. Narayanan, "Composite focus measure for high quality depth maps," in *Int. Conf. Comput. Vis. (ICCV)*, pp. 1623–1631, 2017. [2](#), [3](#), [6](#)
- [44] Said Pertuz, Domenec Puig, and Miguel Angel Garcia, "Analysis of focus measure operators for shape-from-focus," *Pattern Recog.*, vol. 46, no. 5, pp. 1415–1432, 2013. [2](#), [3](#), [4](#), [6](#)
- [45] Elias Mueggler, Henri Rebecq, Guillermo Gallego, Tobi Delbruck, and Davide Scaramuzza, "The event-camera dataset and simulator: Event-based data for pose estimation, visual odometry, and SLAM," *Int. J. Robot. Research*, vol. 36, no. 2, pp. 142–149, 2017. [2](#), [6](#), [7](#), [13](#), [14](#), [15](#), [23](#)
- [46] Rafael C. Gonzalez and Richard Eugene Woods, *Digital Image Processing*. Pearson Education, 2009. [2](#), [3](#), [15](#)
- [47] P. A. P. Moran, "Notes on continuous stochastic phenomena," *Biometrika*, vol. 37, p. 17, June 1950. [4](#), [11](#)
- [48] R. C. Geary, "The contiguity ratio and statistical mapping," *The Incorporated Statistician*, vol. 5, pp. 115–146, Nov. 1954. [4](#)
- [49] Firestone Lawrence, Cook Kitty, Culp Kevin, Talsania Neil, and Preston Kendall, "Comparison of autofocus methods for automated microscopy," *Cytometry*, vol. 12, no. 3, pp. 195–206, 1991. [5](#)
- [50] John von Neumann, "Distribution of the ratio of the mean square successive difference to the variance," *The Annals of Mathematical Statistics*, vol. 12, pp. 367–395, Dec. 1941. [6](#), [12](#)
- [51] Hashim Mir, Peter Xu, and Peter van Beek, "An extensive empirical evaluation of focus measures for digital photography," in *Proc. SPIE*, vol. 9023, pp. 1–11, 2014. [6](#), [8](#)
- [52] Christian Brandli, Raphael Berner, Minhao Yang, Shih-Chii Liu, and Tobi Delbruck, "A 240x180 130dB 3us latency global shutter spatiotemporal vision sensor," *IEEE J. Solid-State Circuits*, vol. 49, no. 10, pp. 2333–2341, 2014. [7](#), [14](#), [15](#)
- [53] Guillermo Gallego, Daniel Berjón, and Narciso García, "Optimal polygonal  $L_1$  linearization and fast interpolation of nonlinear systems," *IEEE Trans. Circuits Syst. I*, vol. 61, pp. 3225–3234, Nov. 2014. [7](#), [24](#)
- [54] Daniel Berjon, Guillermo Gallego, Carlos Cuevas, Francisco Moran, and Narciso Garcia, "Optimal piecewise linear function approximation for GPU-based applications," *IEEE Trans. Cybern.*, vol. 46, pp. 2584–2595, Nov. 2016. [7](#)
- [55] Alex Zihao Zhu, Liangzhe Yuan, Kenneth Chaney, and Kostas Daniilidis, "EV-FlowNet: Self-supervised optical flow estimation for event-based cameras," in *Robotics: Science and Systems (RSS)*, 2018. [8](#)
- [56] Guillermo Gallego, Anthony Yezzi, Francesco Fedele, and Alvis Benetazzo, "Variational stereo imaging of oceanic waves with statistical constraints," *IEEE Trans. Image Process.*, vol. 22, pp. 4211–4223, Nov. 2013. [11](#)
